# Supplementary material for: Phosphotransferase-dependent accumulation of (p)ppGpp in response to glutamine deprivation in Caulobacter crescentus
Source: PubMed Central journal article supplement (PMC4848567; doi:10.1038/ncomms11423), 2016-04-25
Supplement: ncomms11423-s1.pdf [file ncomms11423-s1.pdf]

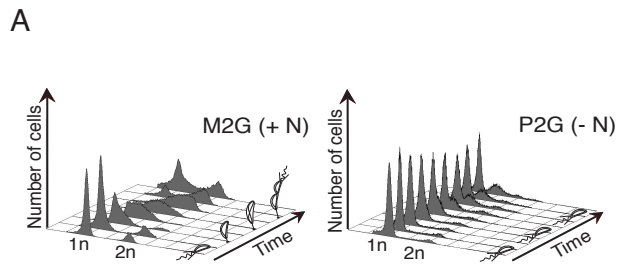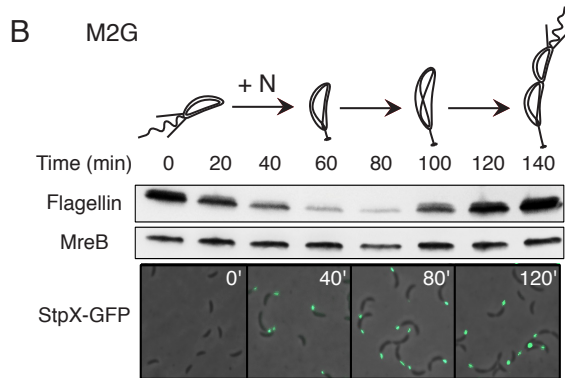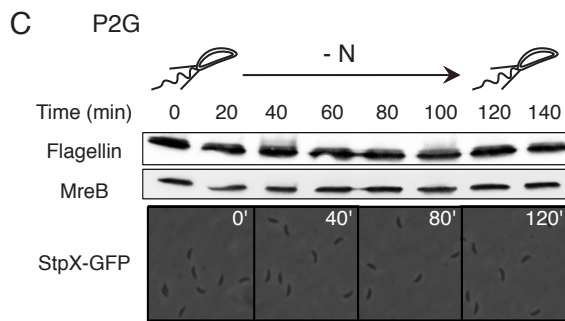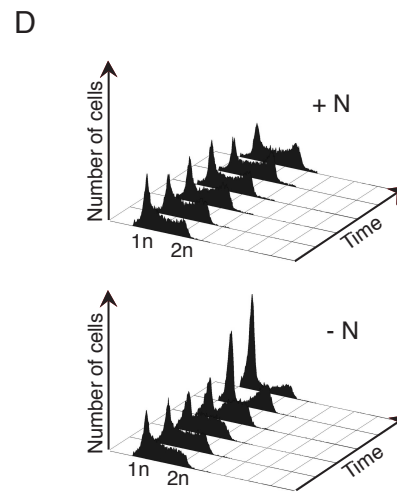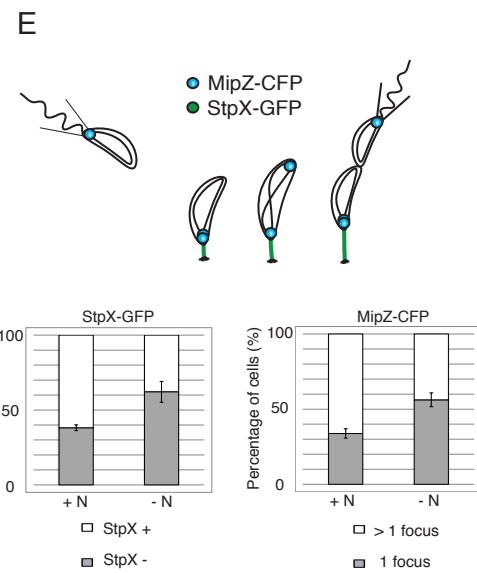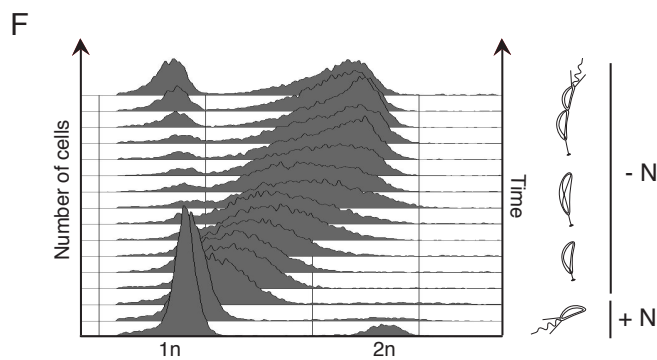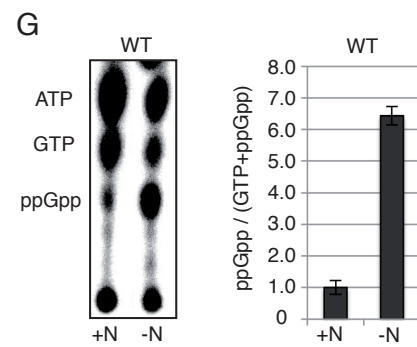

**Supplementary Figure 1. *Caulobacter crescentus* accumulates G1/swarmer cells and (p)ppGpp upon nitrogen starvation.**

**(A)** Swarmer cells cannot replicate DNA upon nitrogen starvation. Flow cytometry analysis was used to determine DNA content throughout the cell cycle of WT (RH50) grown in M2G (+N) or P2G (-N) media. Samples were withdrawn every 20 min from a synchronized population of WT (RH50) grown in M2G or P2G.

**(B-C)** Swarmer cells cannot differentiate into stalked cells upon nitrogen starvation. Immunoblot and fluorescence microscopy analyses were used to respectively determine the relative abundance of proteins (Flagellin and MreB), and localization of StpX-GFP throughout the cell cycle of *C. crescentus* strains grown in M2G (+N) or P2G (-N) media. Proteins were extracted every 20 min from a synchronized population of WT (RH50) grown in M2G **(B)** or P2G **(C)**. Phase contrast and fluorescence micrographs were taken every 40 min from a synchronized population of NA1000 *stpX::stpX-gfp* (RH507) grown in M2G **(B)** or P2G **(C)**.

**(D-E)** Swarmer cells can neither initiate DNA replication nor differentiate into stalked cell upon nitrogen starvation. **(D)** Flow cytometry analysis was used to determine DNA content in asynchronous population of WT (RH50) grown for 6 hours in M2G (+N) or P2G (-N) media. Samples were withdrawn every hour from a synchronized population of WT (RH50) grown in M2G or P2G. **(E)** Fluorescence microscopy to determine localization of StpX-GFP and MipZ-CFP in asynchronous population of WT (RH50) grown for 6 hours in M2G (+N) or P2G (-N) media. G1/swarmer cells (without StpX-GFP signal or with only 1 focus of MipZ-CFP) were counted and normalized (grey columns) to the total number of cells (100%).

**(F)** Synchronized stalked cells are able to complete DNA replication despite the absence of nitrogen source. Samples were withdrawn every 20 min from a synchronized population of WT (RH50) first grown in M2G (+N) for the first 40 min (to allow the differentiation of swarmer cells into stalked cells) and then in P2G (-N).

**(G)** *C. crescentus* accumulates (p)ppGpp upon nitrogen starvation. Intracellular levels of (p)ppGpp detected by TLC after nucleotides extraction of WT (RH50) grown in nitrogen-replete (+N) or -deplete (-N) conditions. Error bars = SD, n = 3.

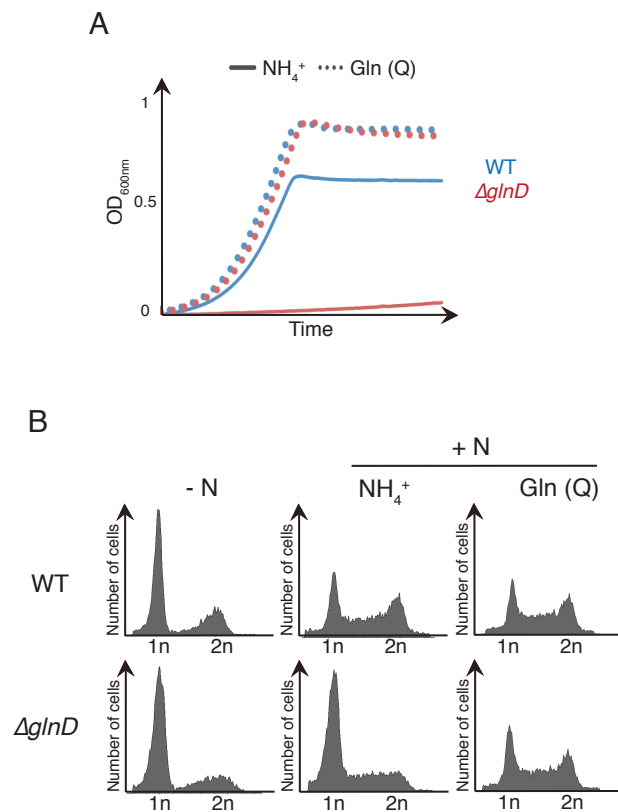

**Supplementary Figure 2. Glutamine auxotrophy displayed by *ΔglnD* responsible for G1/swarmer cells accumulation displayed by *ΔglnD*.**

(A) Growth of WT (RH50) and *ΔglnD* (RH577) in minimal media containing NH<sub>4</sub><sup>+</sup> (M2G) or glutamine (P2GQ) as the only nitrogen source. (B) Flow cytometry analysis to determine DNA content in asynchronous population of WT (RH50) and *ΔglnD* (RH577) in minimal media without any nitrogen source (P2G) or with NH<sub>4</sub><sup>+</sup> (M2G) or glutamine (P2GQ) as the only nitrogen source.

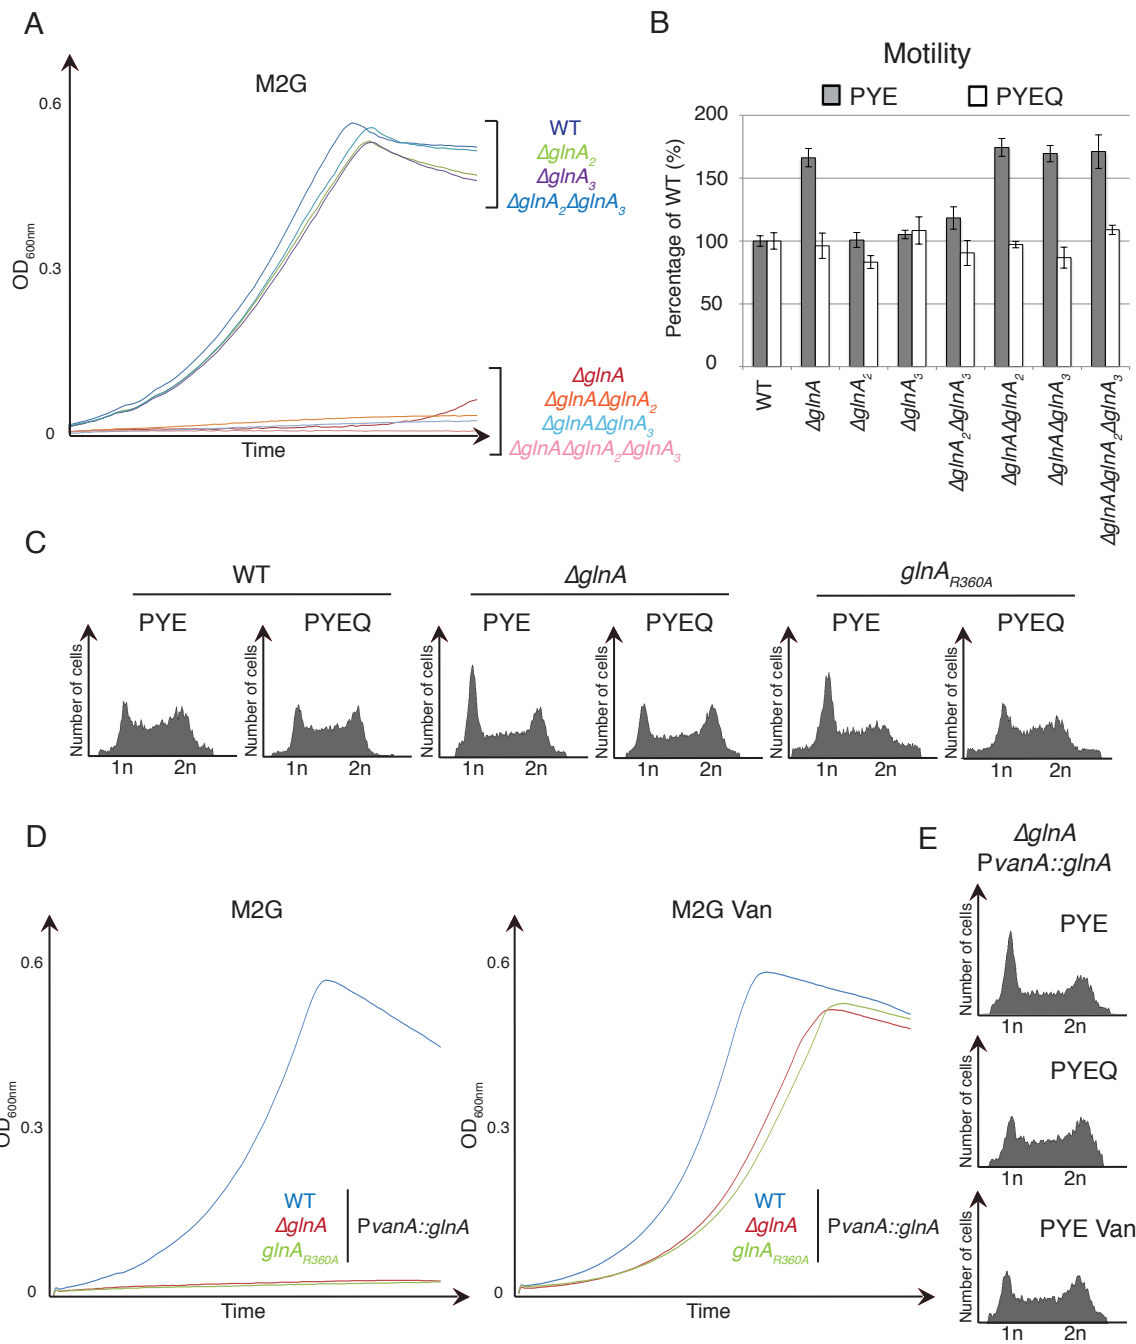

**Supplementary Figure 3. GlnA is the only glutamine synthetase required to assimilate ammonium in *Caulobacter crescentus* grown in minimal and complex media.**

**(A-C)** Loss-of-function *glnA* mutants are auxotrophic for glutamine, cannot grow in minimal medium (M2G) and increase G1/swarmer cells proportion in complex medium (PYE). **(A)** Growth in minimal medium and **(B)** motility on PYE swarm agar plates without (PYE) or with glutamine (PYEQ) of WT (RH50),  $\Delta glnA$  (RH772)  $\Delta glnA_2$  (RH876),  $\Delta glnA_3$  (RH877),  $\Delta glnA_2 glnA_3$  (RH878),  $\Delta glnA_2 glnA$  (RH970),  $\Delta glnA_3 glnA$  (RH971) and  $\Delta glnA_2 glnA_3 glnA$  (RH879). **(C)** Flow cytometry analysis to determine DNA content in asynchronous population of WT (RH50) and  $\Delta glnA$  (RH772) and *glnA*<sub>R360A</sub> (RH1632) grown in complex medium (PYE) supplemented with glutamine (PYEQ).

**(D-E)** Loss-of-function *glnA* mutants can be complemented by expressing *glnA* *in trans*. **(D)** Growth of WT (RH50) and  $\Delta glnA$  (RH772) and *glnA*<sub>R360A</sub> (RH1632) harbouring P<sub>vanA</sub>::*glnA* plasmid (pHR533) in minimal medium (M2G) supplemented with 0.5 mM vanillate (M2G Van). **(E)** Flow cytometry analysis to determine DNA content in asynchronous population of WT (RH50),  $\Delta glnA$  (RH772) and *glnA*<sub>R360A</sub> (RH1632) harbouring P<sub>vanA</sub>::*glnA* plasmid (pHR533) in complex medium (PYE) supplemented with 0.5 mM vanillate (PYE Van) or glutamine (PYEQ).

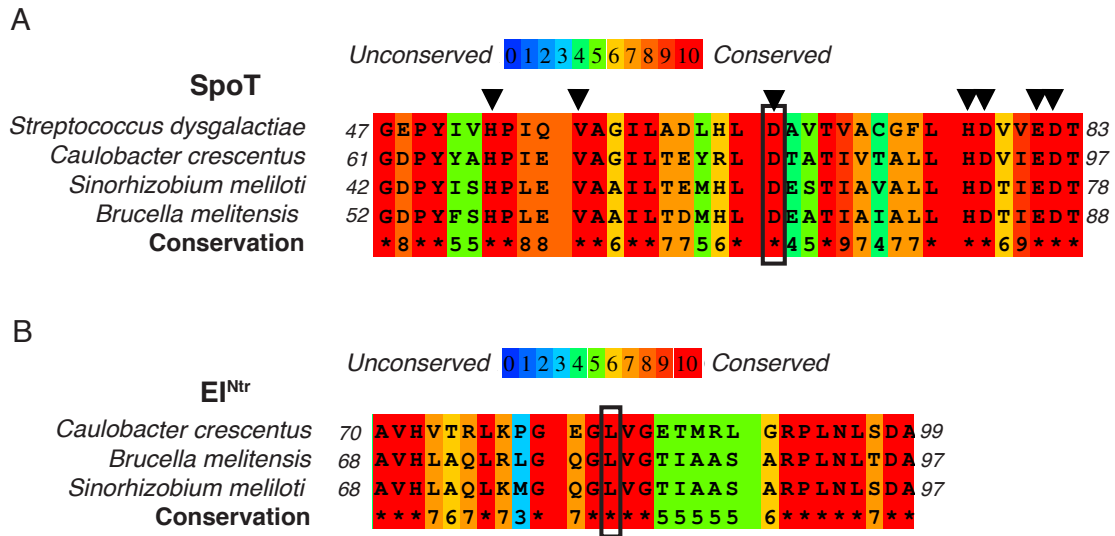

**Supplementary Figure 4. The gain-of-function mutations isolated in SpoT and EI<sup>Ntr</sup> reside in highly conserved regions.**

(A) Aspartate 81 of SpoT<sub>Cc</sub> is highly conserved in proteobacteria. Black arrowheads indicate mutations described to abolish hydrolase activity of SpoT in *Streptococcus dysgalactiae* subsp. *equisimilis*<sup>1</sup>.

(B) Leucine 83 of EI<sup>Ntr</sup><sub>Cc</sub> is highly conserved in  $\alpha$ -proteobacteria.

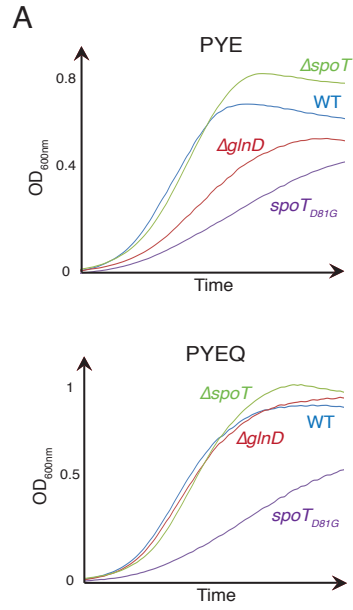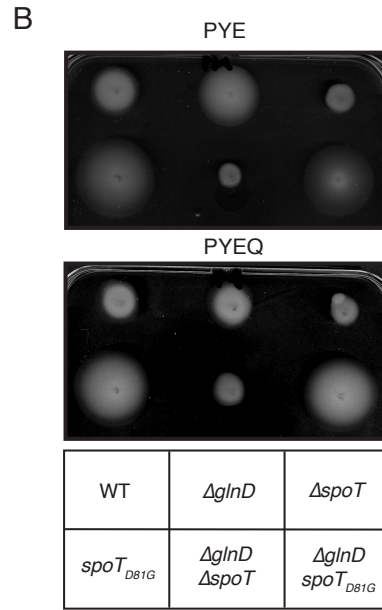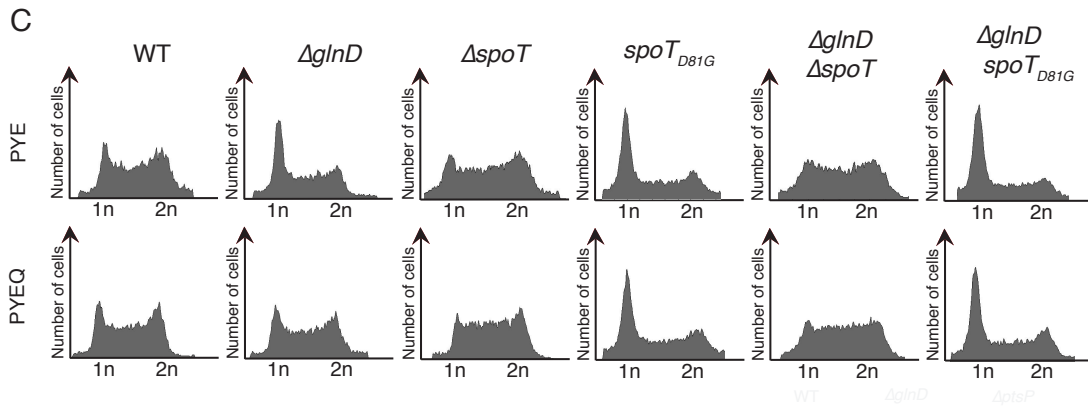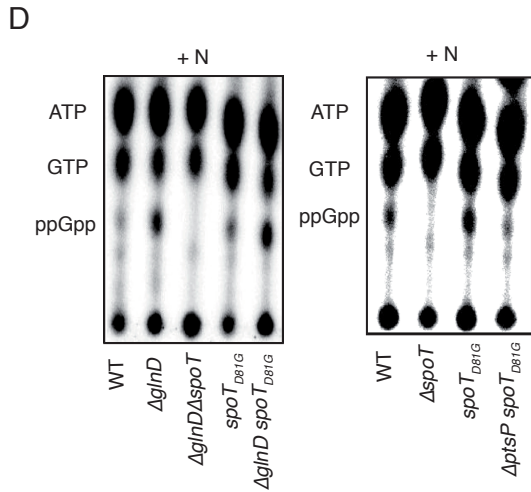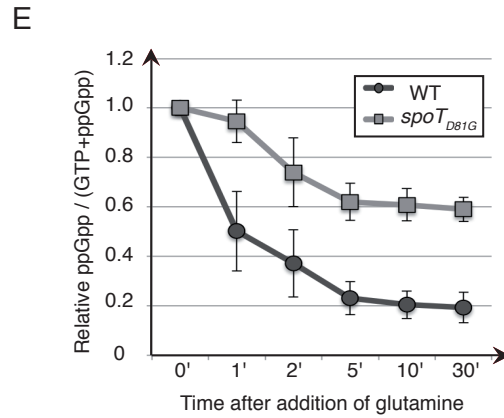

**Supplementary Figure 5. SpoT controls the G1/swarmer lifetime upon nitrogen starvation.**

**(A-C)** The growth defect and G1/swarmer accumulation of *spoT<sub>D81G</sub>* cannot be compensated by exogenous source of glutamine. **(A)** Growth of WT (RH50), *ΔglnD* (RH577), *ΔspoT* (RH1755) and *spoT<sub>D81G</sub>* (RH1752) in complex medium without (PYE) or with glutamine (PYEQ). **(B)** Motility on swarm agar plates and **(C)** DNA content determined by flow cytometry of WT (RH50), *ΔglnD* (RH577), *ΔspoT* (RH1755), *spoT<sub>D81G</sub>* (RH1752), *ΔglnD ΔspoT* (RH1756) and *ΔglnD spoT<sub>D81G</sub>* (RH1753) grown in complex medium without (PYE) or with glutamine (PYEQ).

**(D)** PtsP is required for the SpoT-dependent (p)ppGpp accumulation upon nitrogen starvation. Intracellular levels of (p)ppGpp detected by TLC after nucleotides extraction of WT (RH50), *ΔglnD* (RH577), *ΔglnD ΔspoT* (RH1756), *spoT<sub>D81G</sub>* (RH1752), *ΔglnD spoT<sub>D81G</sub>* (RH1753), *ΔspoT* (RH1755), *ΔptsP spoT<sub>D81G</sub>* (RH1727) grown in nitrogen-replete (+N) conditions.

**(E)** The hydrolysis of (p)ppGpp is reduced in *spoT<sub>D81G</sub>* in comparison to the wild-type strain. The timing of (p)ppGpp removal was determined by measuring (p)ppGpp content in WT (RH50) and *spoT<sub>D81G</sub>* (RH1752) after 2h in nitrogen starvation followed by addition of glutamine (T = 0). Error bars = SD, n = 2.



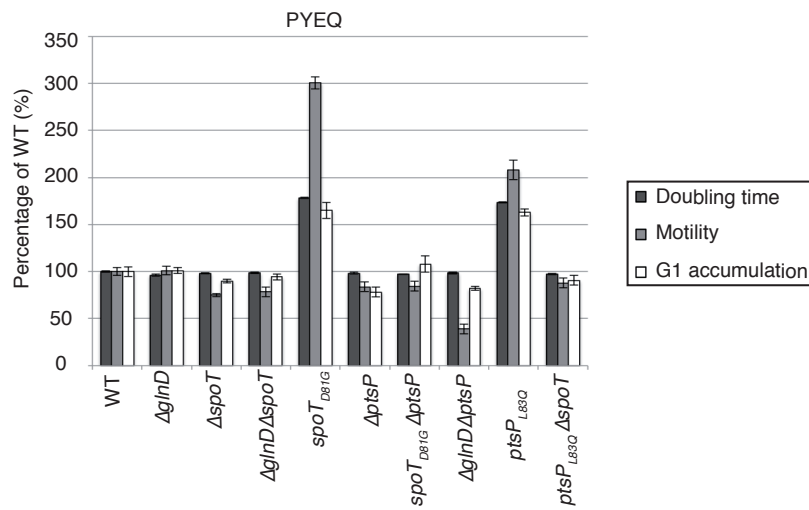

**Supplementary Figure 6. The cell cycle and developmental defects of  $spoT_{D81G}$  and  $ptsP_{L83Q}$  cannot be compensated by addition of exogenous source of glutamine.**

Growth, motility and DNA content of WT (RH50),  $\Delta glnD$  (RH577),  $\Delta spoT$  (RH1755),  $\Delta spoT \Delta glnD$  (RH1756),  $spoT_{D81G}$  (RH1752),  $\Delta ptsP$  (RH1758),  $\Delta ptsP spoT_{D81G}$  (RH1727),  $\Delta glnD \Delta ptsP$  (RH1940),  $ptsP_{L83Q}$  (RH1748) and  $ptsP_{L83Q} \Delta spoT$  (RH1728) were determined in complex medium supplemented with glutamine (PYEQ).

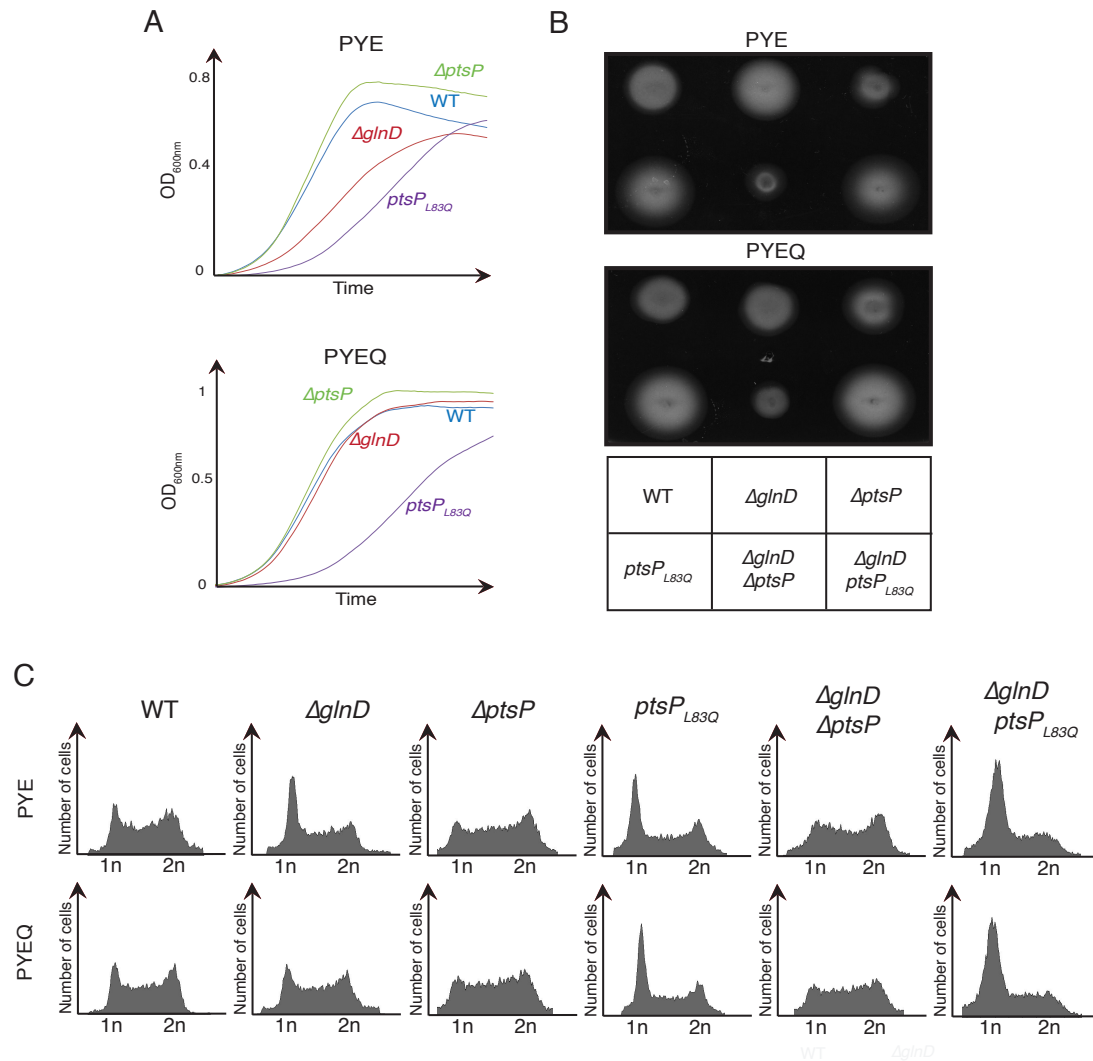

### Supplementary Figure 7. $EI^{Ntr}$ controls the G1/swarmer lifetime upon nitrogen starvation.

(A-C) The growth defect and G1/swarmer accumulation of  $ptsP_{L83Q}$  cannot be compensated by exogenous source of glutamine. (A) Growth of WT (RH50),  $\Delta glnD$  (RH577),  $\Delta ptsP$  (RH1758) and  $ptsP_{L83Q}$  (RH1748) in complex medium without (PYE) or with glutamine (PYEQ). (B) Motility on swarm agar plates and (C) DNA content determined by flow cytometry of WT (RH50),  $\Delta glnD$  (RH577),  $\Delta ptsP$  (RH1758),  $ptsP_{L83Q}$  (RH1748),  $\Delta glnD \Delta ptsP$  (RH1940) and  $ptsP_{L83Q} \Delta glnD$  (RH1941) grown in complex medium without (PYE) or with glutamine (PYEQ).

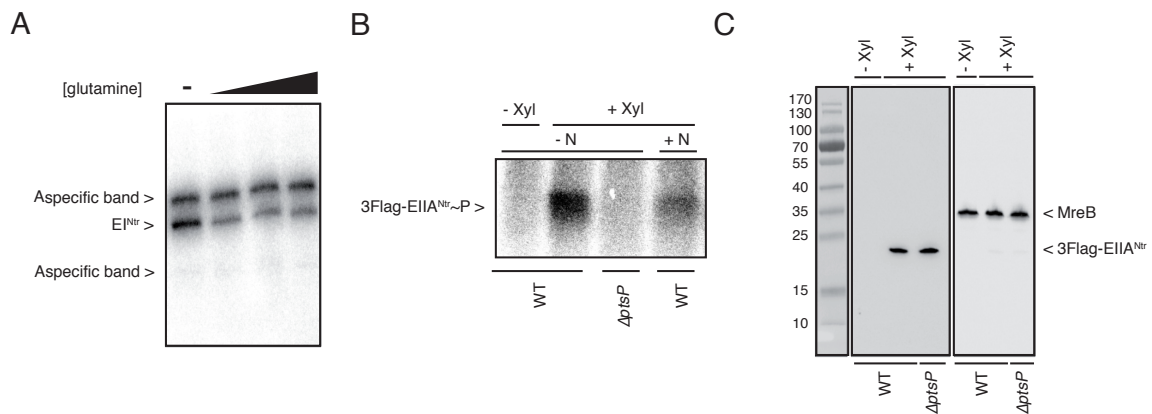

**Supplementary Figure 8. Glutamine inhibits PTS<sup>Ntr</sup> phosphorylation.**

**(A)** Glutamine inhibits autophosphorylation of EI<sup>Ntr</sup>. Autophosphorylation assays of EI<sup>Ntr</sup> using [<sup>32</sup>P]PEP as a phosphoryl donor in the absence or presence of increasing concentration of glutamine (0, 2, 5, 10 mM).

**(B)** The EI<sup>Ntr</sup>-dependent phosphorylation of EIIA<sup>Ntr</sup> is enhanced upon nitrogen starvation. *In vivo* phosphorylation assays of EIIA<sup>Ntr</sup> in nitrogen-deplete (-N) or nitrogen-replete (+N) conditions supplemented with (+ Xyl) or without (- Xyl) xylose in WT or ΔptsP expressing 3FLAG-ptsN from P<sub>xyI</sub>X promoter.

**(C)** Immunoblotting of protein samples extracted from WT and ΔptsP expressing 3FLAG-ptsN from P<sub>xyI</sub>X promoter, incubated 3 hours in M5GG supplemented with (+ Xyl) or without (- Xyl) xylose. MreB was detected in all conditions while 3FLAG-EIIA<sup>Ntr</sup> was detected only in the presence of xylose.

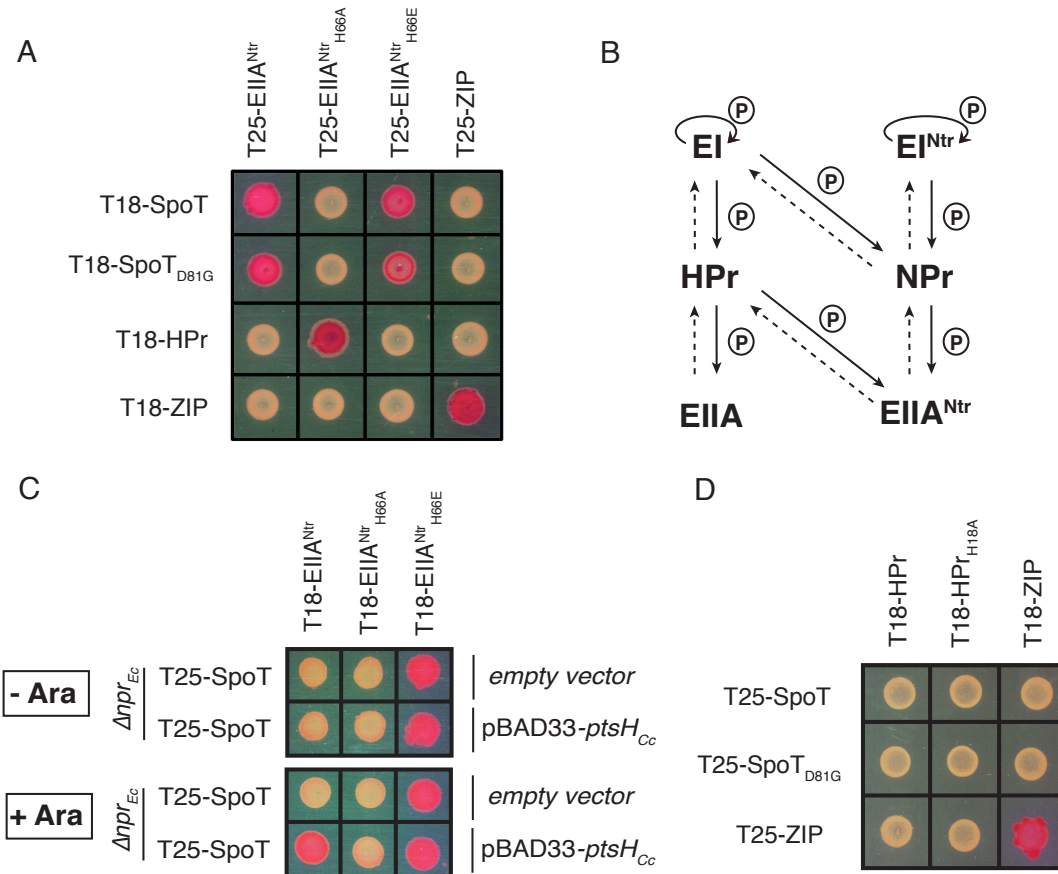

### Supplementary Figure 9. EIIA<sup>Ntr</sup>~P physically interacts with SpoT.

(A) EIIA<sup>Ntr</sup>~P interacts with SpoT (or SpoT<sub>D81G</sub>) in a BTH assay. MG1655 *cyaA::frit* (RH785) strain coexpressing T18- or T25- fused to *ptsN*, *ptsN*<sub>H66A</sub>, *ptsN*<sub>H66E</sub>, *spoT*, *spoT*<sub>D81G</sub>, *ptsH*, *ptsH*<sub>H18A</sub> or *ZIP* were spotted on MacConkey Agar Base plates supplemented with 1% maltose and 1 mM IPTG. Plates were incubated for 3-4 days at 30 °C. The red color indicates positive interactions.

(B) Schematic representation of the PTS and PTS<sup>Ntr</sup> pathways in *E. coli*. NPr and EIIA<sup>Ntr</sup> are can also be phosphorylated by the PTS system.

(C) *Caulobacter* HPr (HPr<sub>Cc</sub>) restores the interaction between EIIA<sup>Ntr</sup> and SpoT in a  $\Delta npr$  background. MG1655 *cyaA::frit*  $\Delta npr$  (RH2122) strain harbouring pBAD33 or pBAD33-*ptsH* and coexpressing T18- or T25- fused to *ptsN*, *ptsN*<sub>H66A</sub>, *ptsN*<sub>H66E</sub> or *spoT* were spotted on MacConkey Agar Base plates supplemented with 1% maltose, 1 mM IPTG and with or without 0.05% arabinose. Plates were incubated for 3-4 days at 30 °C. The red color indicates positive interactions.

(D) Neither HPr nor HPr<sub>H18A</sub> interacts with SpoT (or SpoT<sub>D81G</sub>) in a BTH assay. MG1655 *cyaA::frt* (RH785) strain coexpressing T18- or T25- fused to *ptsH*, *ptsH<sub>H18A</sub>*, *spoT*, *spoT<sub>D81G</sub>*, or *ZIP* were spotted on MacConkey Agar Base plates supplemented with 1% maltose and 1 mM IPTG. Plates were incubated for 3-4 days at 30 °C. The red color indicates positive interactions.

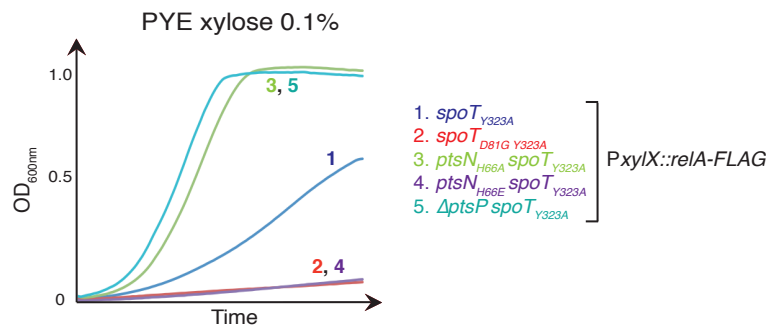

**Supplementary Figure 10. The hydrolase activity of SpoT is required for growth upon artificial accumulation of (p)ppGpp.**

Growth of *spoT*<sub>Y323A</sub>, *spoT*<sub>D81G Y323A</sub>, *ptsN*<sub>H66A</sub> *spoT*<sub>Y323A</sub>, *ptsN*<sub>H66E</sub> *spoT*<sub>Y323A</sub> and  $\Delta$ *ptsP* *spoT*<sub>Y323A</sub> containing the pXTCYC-4-*relA*-FLAG vector (PxyIX::*relA*-FLAG) in PYE medium supplemented with 0.1% xylose.

### Supplementary Table 1. Oligonucleotides used in this study.

Inserted restriction sites are indicated in capital letter

| Name | Sequence                           |
|------|------------------------------------|
| 147  | tttAAGCTTatggtcgagaccgcctccat      |
| 148  | cttagtcGAATTCaccgtcgacgacgtgtcca   |
| 149  | cttagtcGAATTCctggagcagaacgaagccag  |
| 150  | cttagtcGGATCCaaggtcatgccgccagt     |
| 190  | tcctggctcagtcgggtgc                |
| 191  | cgggcctgatcgaaagcgtc               |
| 250  | tttAAGCTTgggttttcgcgcgacat         |
| 251  | cttagtcGAATTCgacgaccgctatgatcagtt  |
| 252  | cttagtcGAATTCgaaaccggctcggccgctct  |
| 253  | cttagtcGGATCCacgttgctcgcaggggtca   |
| 254  | cgcctgttcggtatagacg                |
| 255  | acattgaCATATGgatgacggcttcgatctct   |
| 256  | acattgaCATATGatccgatccgaaccggaga   |
| 257  | cttagtcGGATCCcggcagttcggtcgaatcga  |
| 258  | tttAAGCTTatcgtaggcgtcaaatgaagc     |
| 259  | cttagtcGAATTCcaggatgtccttggcgggtgc |
| 260  | gatgcgcctgcaactgcacc               |
| 261  | cttagtcGGATCCacgcggccgttcgaggattc  |
| 262  | cttagtcGGATCCtgattgtcgcctctcg      |
| 263  | cttagtcGAATTCaatcacggcgacgatcatct  |
| 264  | cttagtcGAATTCatgccggctgacccaaca    |
| 265  | tttAAGCTTcgtcgatgatcaccgccttc      |
| 311  | tgccaatgcgctgttcgac                |
| 312  | tcgaggtgccgggtatcatc               |

313 cacataggccggtccagg  
314 cggaaggtcgactggaagg  
315 catccgcttcatcagcgagc  
316 aggtcttggcagctgtcgac  
317 caaaaccggtgtgtcgcg  
318 cagatcgaagtcggcggtgc  
341 cttagtcGGATCCagggcgatcatcgattgc  
342 cttagtcGAATTCcgcttcatacggccgctcag  
343 cttagtcGAATTCgcgccctatgaggcggtcgt  
344 gtccctgcgcttgaagcgct  
345 cttagtcAAGCTTcgtacgctgccaatgacgac  
346 cttagtcGAATTCcaggatctggtcgcttgg  
347 cttagtcGAATTCgagcgggagttcctgctgct  
348 cttagtcGGATCCagatagtcgctcctcag  
349 cttagtcAAGCTTcgtcttcttgggcaagg  
350 cttagtcGAATTCgatgtcggtacagcgctca  
351 cttagtcGAATTCgactggtacctgcaacgc  
352 cttagtcGGATCCagaactccggccgggatcg  
383 caccgtcatggtctttgtagtc  
435 gctcctggtcgatgcggatg  
436 gatcgttcccgtcggagacc  
437 cggaggctgtgtcatgaggc  
438 agccatagcgatcggccatc  
439 tcatcgacgagaccacacg  
440 acctgctcttgcggtagcc  
648 cgacgaaaccgatcggatcc  
649 cttagtcGAATTCgaggacgagacggatagagc  
650 cttagtcGAATTCttgggcctcaaccgcaacac  
651 cttagtcAAGCTTcgacgtaggaattggcgacc



652 cttagtcAAGCTTgagtctcagcgctcgctcg  
653 cttagtcGAATTCgccttcatcctccaggatgc  
654 cttagtcGAATTCctgcaccgtaagctgaagtcc  
655 cttagtcGGATCCgacaaaccacgcctcgatcg  
727 tctacttcggccctgaagcc  
728 gcagttcggtcgaatcgaacg  
729 ttttCATATGagcaccgccaaggacatcc  
730 ccGGTACCcttggcgtttgcctaagcc  
762 ctggttcgccggcgacaagta  
763 cttcagctcgatgtagctgtcg  
779 cgcgcaactgtgaagacgg  
780 cggccgaaaatccggtgtcc  
781 gactttcgatcgctgcaccg  
782 acagcgtatagcgggtcacg  
802 gactaagAAGCTTcagatcgtcgagaccatgg  
803 gactaagGGTACCcacgagcccgatcatgcctt  
804 gactaagGGTACCgtgctcgcggagaaaagtg  
805 gactaagGGATCctacgaactggtggcgatcg  
806 gactaagAAGCTTctaacgggcgtatcaagacc  
807 gactaagGGTACCcgttcttgaagccatgcccg  
808 gactaagGGTACCgaggagcggtaaacacctcc  
809 gactaagGGATCCggcctatgggccaactacg  
814 agaccctggacctcgtcacc  
815 atgcgcgtcaggggaagtcg  
825 caccaagacgagaacatccaagc  
826 aggtcaccaagtggctgaag  
877 ttcgtagtcgttccaaagccgc  
878 ccagcatctggtcgatctgg  
885 ccgcgatttctgactgacc

894 AAGCTTAcacctcatcagcacgctgc  
895 GAATTCagacataggcgcggttcagc  
896 GAATTCtcttcgacaccgacatcgacg  
897 GGATCCcgctgtcgaaagcttcgagg  
898 gatggtcgaccgcgataacg  
899 gcgcgagatccatgaagagc  
900 gatattgctgaagagcttggcggcgaa  
905 AAGCTTgcggttgcacgagggatgg  
906 GTACCGatgccggatgccccatga  
907 GTACCCgcaagctctacgtcgccgt  
908 GGATCCgttcttgaagcgggcccacg  
923 cgcctaagcggaaacaacGCG  
944 AAGCTTccctggccaagatcgatacg  
945 GTACCCgcaacctggaaagcgctg  
946 GTACCCgctctgctgaccgacgaac  
947 GGATccctctgacggccatgtgga  
961 gactacaaagaccatgacggtg  
963 Gtcgtggtcagcaaggaagg  
964 Gtcggccatgaccaccttgg  
972 Gagatggtcagctccagcgag  
973 cgaacaggcgataggtctcc  
1078 ccatacgatgtccagattacgc  
1126 cgtcgggtgattatcgtcgg  
1175 TCTAGAgttgctgctgtggccccgctcgtg  
1176 GAATTCctgaaggagagggctcctg  
1177 TCTAGAggtgacgggcatggctcaagaacg  
1178 GAATTCtaccgctcctcgtcgaaccgga  
1181 TCTAGAggtgtcatggtctggcgcgctcgg  
1182 GAATTCgaagaaggtcagaagggcgtc

1262 ATGCTCACTCGCCTGCGCGAAATAGTCGAAAAGGTAGCCgtgtaggctggagctgcttc  
1263 CTATAACCCTCCGCGAATCAGCCCGCCCATGCCGCGACGcatatgaatatcctcctta  
1273 gactcaaggtagcgttgga  
1274 ttctgtcgtcggaaccag  
1275 aacgcatctgcttatcgacg  
1276 ctccgaaaatgcagatagc  
1310 tccagtcacgcatcgtacg  
1311 ttggcatctccgatgagc  
1349 cctaagtaactaaTCTAGAaggaggagtaatgacgggcatggcttcaagaacg  
1350 ggatccccgggtaCTGCAGaggaggcggagggtgtacc

**Supplementary Table 2. Plasmids used in this study.**

| Name   | description                                 | Reference                                              |
|--------|---------------------------------------------|--------------------------------------------------------|
|        | pNPTS138                                    | M. R. Alley, Imperial College London (UK), unpublished |
|        | pRVMCS-5                                    | 2                                                      |
|        | pNPTS138- <i>mipZ::mipZ-mcfp</i>            | 3                                                      |
|        | pNPTS138- <i>HA-spoT</i>                    | 4                                                      |
|        | pKT25                                       | 5                                                      |
|        | pUT18C                                      | 5                                                      |
|        | pKT25- <i>zip</i>                           | 5                                                      |
|        | pUT18C- <i>zip</i>                          | 5                                                      |
|        | pCP20                                       | 6                                                      |
|        | pBAD33                                      | 7                                                      |
|        | pXTCYC-4- <i>relA-FLAG</i>                  | 8                                                      |
| pHR322 | pNPTS138- $\Delta$ <i>glnD</i>              | This study                                             |
| pHR366 | pNPTS138- $\Delta$ <i>glnK</i>              | This study                                             |
| pHR367 | pNPTS138- $\Delta$ <i>glnB</i>              | This study                                             |
| pHR368 | pNPTS138- $\Delta$ <i>glnA</i>              | This study                                             |
| pHR369 | pNPTS138- $\Delta$ <i>glnC</i>              | This study                                             |
| pHR389 | pNPTS138- $\Delta$ <i>glnE</i>              | This study                                             |
| pHR390 | pNPTS138- $\Delta$ <i>glnA</i> <sub>2</sub> | This study                                             |
| pHR391 | pNPTS138- $\Delta$ <i>glnA</i> <sub>3</sub> | This study                                             |
| pHR523 | pNPTS138- $\Delta$ <i>ptsN</i>              | This study                                             |
| pHR533 | pRVMCS-5- <i>glnA</i>                       | This study                                             |
| pHR542 | pNPTS138- $\Delta$ <i>ntrC</i>              | This study                                             |
| pHR543 | pNPTS138- $\Delta$ <i>ntrX</i>              | This study                                             |
| pHR545 | pNPTS138- <i>glnA</i> <sub>R360A</sub>      | This study                                             |
| pHR589 | pNPTS138- $\Delta$ <i>ptsM</i>              | This study                                             |
| pHR590 | pNPTS138- $\Delta$ <i>ptsH</i>              | This study                                             |

|        |                                        |            |
|--------|----------------------------------------|------------|
| pHR594 | pNPTS138- <i>ptsH</i> <sub>H18A</sub>  | This study |
| pHR628 | pNPTS138- <i>ptsP</i> <sub>L83Q</sub>  | This study |
| pHR634 | pNPTS138- <i>spoT</i> <sub>D81G</sub>  | This study |
| pHR638 | pNPTS138- $\Delta$ <i>spoT</i>         | This study |
| pHR639 | pNPTS138- $\Delta$ <i>ptsP</i>         | This study |
| pHR645 | pNPTS138- <i>spoT</i> <sub>Y323A</sub> | This study |
| pHR689 | pUT18C- <i>spoT</i>                    | This study |
| pHR690 | pUT18C- <i>ptsH</i>                    | This study |
| pHR692 | pUT18C- <i>spoT</i> <sub>D81G</sub>    | This study |
| pHR693 | pKT25- <i>ptsN</i>                     | This study |
| pHR694 | pKT25- <i>ptsN</i> <sub>H66A</sub>     | This study |
| pHR695 | pKT25- <i>ptsN</i> <sub>H66E</sub>     | This study |
| pHR699 | pXMCS-2-3FLAG- <i>ptsN</i>             | This study |
| pHR704 | pUT18C- <i>ptsN</i>                    | This study |
| pHR705 | pUT18C- <i>ptsN</i> <sub>H66E</sub>    | This study |
| pHR706 | pUT18C- <i>ptsN</i> <sub>H66A</sub>    | This study |
| pHR711 | pNPTS138- <i>ptsN</i> <sub>H66E</sub>  | This study |
| pHR712 | pNPTS138- <i>ptsN</i> <sub>H66A</sub>  | This study |
| pHR764 | pKT25- <i>spoT</i>                     | This study |
| pHR765 | pKT25- <i>spoT</i> <sub>D81G</sub>     | This study |
| pHR813 | pBAD33- <i>ptsH</i>                    | This study |
| pHR815 | pKT25- <i>ptsH</i>                     | This study |
| pHR816 | pKT25- <i>ptsH</i> <sub>H18A</sub>     | This study |

### Supplementary Table 3. Strains used in this study.

| Name   | Description and relevant genotype                                                                                                                                                                                                | Reference                       |
|--------|----------------------------------------------------------------------------------------------------------------------------------------------------------------------------------------------------------------------------------|---------------------------------|
| RH10   | S17-1 ((F- $\lambda$ - 22nd <i>Athi pro recA hsdR2</i> (r-m+) RP4-2-<br>Tet ::Mu-Km ::Tn7)                                                                                                                                       | 9                               |
| RH319  | MT607( <i>pro-82 thi-I hsdR17</i> (r-m+) <i>supE44 recA56</i> )                                                                                                                                                                  | 10                              |
| RH392  | MG1655 mini $\lambda^{\text{Tet}}$<br><br>Top10                                                                                                                                                                                  | L. Van Melder, ULB<br>(Belgium) |
| RH783  | ( $\phi$ 80 <i>lacZ</i> $\Delta$ M15 <i>araD139</i> $\Delta$ ( <i>ara-leu</i> )7697 <i>galE15 galK16</i><br>$\Delta$ ( <i>lac</i> )X74 <i>rpsL</i> (StrR) <i>nupG recA1 endA1 mcrA</i> $\Delta$ ( <i>mrr-<br/>hsdRMS-mcrBC</i> ) | Life Technologies               |
| RH785  | MG1655 <i>cya</i> :: <i>frt</i>                                                                                                                                                                                                  | 11                              |
| RH2084 | MG1655 $\Delta$ <i>ptsP</i> :: <i>cat</i>                                                                                                                                                                                        | This study                      |
| RH2117 | MG1655 <i>cya</i> :: <i>frt</i> $\Delta$ <i>ptsP</i>                                                                                                                                                                             | This study                      |
| RH2122 | MG1655 <i>cya</i> :: <i>frt</i> $\Delta$ <i>npr</i>                                                                                                                                                                              | This study                      |
| RH2124 | MG1655 <i>cya</i> :: <i>frt</i> $\Delta$ <i>ptsP</i> $\Delta$ <i>ptsI</i>                                                                                                                                                        | This study                      |
| RH50   | NA1000                                                                                                                                                                                                                           | 12                              |
| RH507  | NA1000 <i>stpX</i> :: <i>stpX-gfp</i>                                                                                                                                                                                            | 13                              |
| RH522  | NA1000 <i>mipZ</i> :: <i>mipZ-mcfp</i>                                                                                                                                                                                           | 3                               |
| RH577  | NA1000 $\Delta$ <i>glnD</i>                                                                                                                                                                                                      | This study                      |
| RH737  | NA1000 $\Delta$ <i>glnD</i> <i>stpX</i> :: <i>stpX-gfp</i>                                                                                                                                                                       | This study                      |
| RH770  | NA1000 $\Delta$ <i>glnK</i>                                                                                                                                                                                                      | This study                      |
| RH771  | NA1000 $\Delta$ <i>glnB</i>                                                                                                                                                                                                      | This study                      |
| RH772  | NA1000 $\Delta$ <i>glnA</i>                                                                                                                                                                                                      | This study                      |
| RH773  | NA1000 $\Delta$ <i>glnC</i>                                                                                                                                                                                                      | This study                      |
| RH778  | NA1000 $\Delta$ <i>glnK</i> $\Delta$ <i>glnC</i>                                                                                                                                                                                 | This study                      |
| RH793  | NA1000 $\Delta$ <i>glnD</i> <i>mipZ</i> :: <i>mipZ-mcfp</i>                                                                                                                                                                      | This study                      |
| RH874  | NA1000 $\Delta$ <i>glnE</i>                                                                                                                                                                                                      | This study                      |
| RH875  | NA1000 $\Delta$ <i>glnD</i> $\Delta$ <i>glnE</i>                                                                                                                                                                                 | This study                      |
| RH876  | NA1000 $\Delta$ <i>glnA</i> <sub>2</sub>                                                                                                                                                                                         | This study                      |

|        |                                                  |            |
|--------|--------------------------------------------------|------------|
| RH877  | NA1000 $\Delta glnA_3$                           | This study |
| RH878  | NA1000 $\Delta glnA_2 \Delta glnA_3$             | This study |
| RH879  | NA1000 $\Delta glnA_2 \Delta glnA_3 \Delta glnA$ | This study |
| RH970  | NA1000 $\Delta glnA_2 \Delta glnA$               | This study |
| RH971  | NA1000 $\Delta glnA_3 \Delta glnA$               | This study |
| RH1458 | NA1000 $\Delta ntrC$                             | This study |
| RH1459 | NA1000 $\Delta ntrX$                             | This study |
| RH1621 | NA1000 $\Delta ptsH$                             | This study |
| RH1622 | NA1000 $\Delta ptsM$                             | This study |
| RH1632 | NA1000 $glnA_{R360A}$                            | This study |
| RH1702 | NA1000 $\Delta ptsH \Delta ptsM$                 | This study |
| RH1727 | NA1000 $\Delta ptsP spoT_{D81G}$                 | This study |
| RH1728 | NA1000 $\Delta spoT ptsP_{L83Q}$                 | This study |
| RH1748 | NA1000 $ptsP_{L83Q}$                             | This study |
| RH1752 | NA1000 $spoT_{D81G}$                             | This study |
| RH1753 | NA1000 $\Delta glnD spoT_{D81G}$                 | This study |
| RH1755 | NA1000 $\Delta spoT$                             | This study |
| RH1756 | NA1000 $\Delta glnD \Delta spoT$                 | This study |
| RH1758 | NA1000 $\Delta ptsP$                             | This study |
| RH1782 | NA1000 $\Delta ptsM ptsH_{H18A}$                 | This study |
| RH1819 | NA1000 $\Delta ptsN$                             | This study |
| RH1829 | NA1000 $\Delta ptsM \Delta ptsN$                 | This study |
| RH1844 | NA1000 $spoT_{Y323A}$                            | This study |
| RH1888 | NA1000 $3FLAG-ptsN$                              | This study |
| RH1940 | NA1000 $\Delta glnD \Delta ptsP$                 | This study |
| RH1941 | NA1000 $ptsP_{L83Q} \Delta glnD$                 | This study |
| RH1999 | NA1000 $spoT_{D81G} \Delta ptsN$                 | This study |
| RH2013 | NA1000 $spoT_{D81G} \Delta ptsH$                 | This study |

|        |                                                                              |            |
|--------|------------------------------------------------------------------------------|------------|
| RH2014 | NA1000 <i>spoT</i> <sub>D81G</sub> $\Delta$ <i>ptsN</i> $\Delta$ <i>ptsP</i> | This study |
| RH2015 | NA1000 <i>spoT</i> <sub>D81G</sub> $\Delta$ <i>ptsN</i> $\Delta$ <i>ptsH</i> | This study |
| RH2016 | NA1000 $\Delta$ <i>ptsP</i> <i>ptsN</i> <sub>H66E</sub>                      | This study |
| RH2017 | NA1000 <i>ptsN</i> <sub>H66E</sub>                                           | This study |
| RH2018 | NA1000 <i>ptsP</i> <sub>L83Q</sub> <i>ptsN</i> <sub>H66A</sub>               | This study |
| RH2191 | NA1000 pXMCS-2-3FLAG- <i>ptsN</i>                                            | This study |
| RH2192 | NA1000 $\Delta$ <i>ptsP</i> pXMCS-2-3FLAG- <i>ptsN</i>                       | This study |
| RH2193 | NA1000 <i>spoT</i> <sub>D81G Y323A</sub>                                     | This study |
| RH2194 | NA1000 <i>ptsN</i> <sub>H66A</sub> <i>spoT</i> <sub>Y323A</sub>              | This study |
| RH2195 | NA1000 <i>ptsN</i> <sub>H66E</sub> <i>spoT</i> <sub>Y323A</sub>              | This study |
| RH2196 | NA1000 $\Delta$ <i>ptsP</i> <i>spoT</i> <sub>Y323A</sub>                     | This study |



## Supplementary Methods

### Plasmids construction

#### **pHR322** (pNPTS138- $\Delta$ *glnD*)

Upstream and downstream regions of *C. crescentus* *CCNA\_00013* were amplified from NA1000 gDNA by PCR respectively with primers 147/148 and 149/150 and cloned into pSK. The pSK-147/148 and pSK-149/150 recombinant plasmids were then digested respectively with *Hind* III/*Eco* RI and *Eco* RI/*Bam* HI; and ligated into the pNPTS138 vector cut with *Hind* III and *Bam* HI.

#### **pHR366** (pNPTS138- $\Delta$ *glnK*)

Upstream and downstream regions of *C. crescentus* *CCNA\_01400* were amplified from NA1000 gDNA by PCR respectively with primers 250/251 and 252/253 and cloned into pSK. The pSK-250/251 and pSK-252/253 recombinant plasmids were then digested respectively with *Hind* III/*Eco* RI and *Eco* RI/*Bam* HI; and ligated into the pNPTS138 vector cut with *Hind* III and *Bam* HI.

#### **pHR367** (pNPTS138- $\Delta$ *glnB*)

Upstream and downstream regions of *C. crescentus* *CCNA\_02046* were amplified from NA1000 gDNA by PCR respectively with primers 254/255 and 256/257 and cloned into pSK. The pSK-254/255 and pSK-256/257 recombinant plasmids were then digested respectively with *Hind* III/*Nde* I and *Nde* I/*Bam* HI; and ligated into the pNPTS138 vector cut with *Hind* III and *Bam* HI.

#### **pHR368** (pNPTS138- $\Delta$ *glnA*)

Upstream and downstream regions of *C. crescentus* *CCNA\_02047* were amplified from NA1000 gDNA by PCR respectively with primers 258/259 and 260/261 and cloned into pSK. The pSK-258/259 and pSK-260/261 recombinant plasmids were then digested respectively with *Hind* III/*Eco* RI and *Eco* RI/*Bam* HI; and ligated into the pNPTS138 vector cut with *Hind* III and *Bam* HI.

#### **pHR369** (pNPTS138- $\Delta$ *glnC*)

Upstream and downstream regions of *C. crescentus* *CCNA\_00555* were amplified from NA1000 gDNA by PCR respectively with primers 262/263 and 264/265 and cloned into pSK. The pSK-262/263 and pSK-264/265 recombinant plasmids were then digested respectively with *Bam* HI/*Eco* RI and *Eco* RI/*Hind* III; and ligated into the pNPTS138 vector cut with *Hind* III and *Bam* HI.

**pHR389** (pNPTS138- $\Delta$ *glnE*)

Upstream and downstream regions of *C. crescentus* *CCNA\_02839* were amplified from NA1000 gDNA by PCR respectively with primers 341/342 and 343/344 and cloned into pSK. The pSK-341/342 and pSK-343/344 recombinant plasmids were then digested respectively with *Bam* HI/*Eco* RI and *Eco* RI/*Hind* III; and ligated into the pNPTS138 vector cut with *Hind* III and *Bam* HI.

**pHR390** (pNPTS138- $\Delta$ *glnA*<sub>2</sub>)

Upstream and downstream regions of *C. crescentus* *CCNA\_03230* were amplified from NA1000 gDNA by PCR respectively with primers 345/346 and 347/348 and cloned into pSK. The pSK-345/346 and pSK-347/348 recombinant plasmids were then digested respectively with *Hind* III/*Eco* RI and *Eco* RI/*Bam* HI; and ligated into the pNPTS138 vector cut with *Hind* III and *Bam* HI.

**pHR391** (pNPTS138- $\Delta$ *glnA*<sub>3</sub>)

Upstream and downstream regions of *C. crescentus* *CCNA\_03240* were amplified from NA1000 gDNA by PCR respectively with primers 349/350 and 351/352 and cloned into pSK. The pSK-349/350 and pSK-351/352 recombinant plasmids were then digested respectively with *Hind* III/*Eco* RI and *Eco* RI/*Bam* HI; and ligated into the pNPTS138 vector cut with *Hind* III and *Bam* HI.

**pHR523** (pNPTS138- $\Delta$ *ptsN*)

Upstream and downstream regions of *C. crescentus* *CCNA\_03710* were amplified from NA1000 gDNA by PCR respectively with primers 944/945 and 946/947 and cloned into pSK. The pSK-944/945 and pSK-946/947 recombinant plasmids were then digested respectively with *Hind* III/*Asp* 718 and *Asp* 718/*Bam* HI; and ligated into the pNPTS138 vector cut with *Hind* III and *Bam* HI.

**pHR533** (pRVMCS-5-*glnA*)

*C. crescentus* *CCNA\_02047* was amplified from NA1000 gDNA by PCR with primers 729 and 730 and cloned into pSK. The pSK-729/730 recombinant plasmid was then digested with *Nde* I and *Asp* 718 and ligated into the pRVMCS-5 vector cut with the same restriction enzymes.

**pHR542** (pNPTS138- $\Delta$ *ntrC*)

Upstream and downstream regions of *C. crescentus* *CCNA\_01815* were amplified from NA1000 gDNA by PCR respectively with primers 648/649 and 650/651 and

cloned into pSK. The pSK-648/649 and pSK-650/651 recombinant plasmids were then digested respectively with *Hind* III/*Eco* RI and *Eco* RI/*Bam* HI; and ligated into the pNPTS138 vector cut with *Hind* III and *Bam* HI.

**pHR543** (pNPTS138- $\Delta ntrX$ )

Upstream and downstream regions of *C. crescentus* *CCNA\_01817* were amplified from NA1000 gDNA by PCR respectively with primers 652/653 and 654/655 and cloned into pSK. The pSK-652/653 and pSK-654/655 recombinant plasmids were then digested respectively with *Hind* III/*Eco* RI and *Eco* RI/*Bam* HI; and ligated into the pNPTS138 vector cut with *Hind* III and *Bam* HI.

**pHR545** (pNPTS138-*glnA*<sub>R360A</sub>)

DNA fragment of *C. crescentus* *CCNA\_02047* encompassing catalytic site mutation R360A was synthesized as a gBlock (ITD), amplified by PCR with primers 762/763 and cloned into pNPTS138 cut with *Eco* RV.

**pHR589** (pNPTS138- $\Delta ptsM$ )

Upstream and downstream regions of *C. crescentus* *CCNA\_00240* were amplified from NA1000 gDNA by PCR respectively with primers 802/803 and 804/805 and cloned into pSK. The pSK-802/803 and pSK-804/805 recombinant plasmids were then digested respectively with *Hind* III/*Asp* 718 and *Asp* 718/*Bam* HI; and ligated into the pNPTS138 vector cut with *Hind* III and *Bam* HI.

**pHR590** (pNPTS138- $\Delta ptsH$ )

Upstream and downstream regions of *C. crescentus* *CCNA\_00241* were amplified from NA1000 gDNA by PCR respectively with primers 806/807 and 808/809 and cloned into pSK. The pSK-806/807 and pSK-808/809 recombinant plasmids were then digested respectively with *Hind* III/*Asp* 718 and *Asp* 718/*Bam* HI; and ligated into the pNPTS138 vector cut with *Hind* III and *Bam* HI.

**pHR594** (pNPTS138-*ptsH*<sub>H18A</sub>)

DNA fragment of *C. crescentus* *CCNA\_00241* encompassing the non-phosphorylatable mutation R360A was synthesized as a gBlock (ITD), amplified by PCR with primers 825/826 and cloned into pNPTS138 cut with *Eco* RV.

**pHR628** (pNPTS138-*ptsP*<sub>L83Q</sub>)

*C. crescentus* CCNA\_00892 with the mutation L83Q was amplified from a gain-of-function mutant isolated on swarm agar plates supplemented with 9 mM Glutamine by PCR with primers 877 and 878 and cloned into pNPTS138 cut with *Eco* RV.

**pHR634** (pNPTS138-*spoT*<sub>D81G</sub>)

*C. crescentus* CCNA\_01622 with the mutation D81G was amplified from a gain-of-function mutant isolated on swarm agar plates supplemented with 9 mM Glutamine by PCR with primers 894 and 885 and cloned into pNPTS138 cut with *Eco* RV.

**pHR638** (pNPTS138- $\Delta$ *spoT*)

Upstream and downstream regions of *C. crescentus* CCNA\_01622 were amplified from NA1000 gDNA by PCR respectively with primers 894/895 and 896/897 and cloned into pSK. The pSK-894/895 and pSK-896/897 recombinant plasmids were then digested respectively with *Hind* III/*Eco* RI and *Eco* RI/*Bam* HI; and ligated into the pNPTS138 vector cut with *Hind* III and *Bam* HI.

**pHR639** (pNPTS138- $\Delta$ *ptsP*)

Upstream and downstream regions of *C. crescentus* CCNA\_00892 were amplified from NA1000 gDNA by PCR respectively with primers 905/906 and 907/908 and cloned into pSK. The pSK-905/906 and pSK-907/908 plasmids were then digested respectively with *Hind* III/*Asp* 718 and *Asp* 718/*Bam* HI; and ligated into the pNPTS138 vector cut with *Hind* III and *Bam* HI.

**pHR645** (pNPTS138-*spoT*<sub>Y323A</sub>)

DNA fragment of *C. crescentus* CCNA\_01622 encompassing catalytic site mutation Y323A was synthesized as a gBlock (ITD), amplified by PCR with primers 932/933 and cloned into pNPTS138 cut with *Eco* RV.

**pHR689** (pUT18C-*spoT*)

*C. crescentus* CCNA\_01622 was amplified from NA1000 gDNA by PCR with primers 1175 and 1176 and cloned into pSK. The pSK-1175/1176 recombinant plasmid was then digested with *Xba* I and *Eco* RI and ligated into the pUT18C vector cut with the same restriction enzymes.

**pHR690** (pUT18C-*ptsH*)

*C. crescentus* CCNA\_00241 was amplified from NA1000 gDNA by PCR with primers 1177 and 1178 and cloned into pSK. The pSK-1177/1178 recombinant plasmid was

then digested with *Xba* I and *Eco* RI and ligated into the pUT18C vector cut with the same restriction enzymes.

**pHR692** (pUT18C-*spoT*<sub>D81G</sub>)

*C. crescentus* *CCNA\_01622* with the mutation D81G was amplified from a gain-of-function mutant isolated on swarm agar plates supplemented with 9 mM Glutamine by PCR with primers 1175 and 1176 and cloned into pSK. The pSK-1175/1176 recombinant plasmid was then digested with *Xba* I and *Eco* RI and ligated into the pUT18C vector cut with the same restriction enzymes.

**pHR693** (pKT25-*ptsN*)

*C. crescentus* *CCNA\_03710* was amplified from NA1000 gDNA by PCR with primers 1181 and 1182 and cloned into pSK. The pSK-1181/1182 recombinant plasmid was then digested with *Xba* I and *Eco* RI and ligated into the pKT25 vector cut with the same restriction enzymes.

**pHR694** (pKT25-*ptsN*<sub>H66A</sub>)

DNA fragment of *C. crescentus* *CCNA\_03710* encompassing mutations H66A was synthesized as a gBlock (IDT) and cloned into pSK. The pSK- *ptsN*<sub>H66A</sub> recombinant plasmid was then digested with *Xba* I and *Eco* RI and ligated into the pKT25 vector cut with the same restriction enzymes.

**pHR695** (pKT25-*ptsN*<sub>H66E</sub>)

*C. crescentus* *CCNA\_03710* was amplified from RH2017 by PCR with primers 1181 and 1182 and cloned into pSK. The pSK- *ptsN*<sub>H66E</sub> recombinant plasmid was then digested with *Xba* I and *Eco* RI and ligated into the pKT25 vector cut with the same restriction enzymes.

**pHR704** (pUT18C-*ptsN*)

*C. crescentus* *CCNA\_03710* was amplified from NA1000 gDNA by PCR with primers 1181 and 1182 and cloned into pSK. The pSK-1181/1182 recombinant plasmid was then digested with *Xba* I and *Eco* RI and ligated into the pUT18C vector cut with the same restriction enzymes.

**pHR699** (pXMCS-2-3FLAG-*ptsN*)

3FLAG-*ptsN* was amplified from RH1888 (NA1000 3FLAG-*ptsN*) by PCR with primers 1173 and 1174 and cloned into pSK. The pSK-3FLAG-*ptsN* was then

digested with *Nde*I and *Eco* RI and ligated into the pXMCS-2 cut with the same restriction enzymes.

**pHR705** (pUT18C-*ptsN*<sub>H66E</sub>)

DNA fragment of *C. crescentus* *CCNA\_03710* encompassing mutations H66E was synthesized as a gBlock (IDT) and cloned into pSK. The pSK- *ptsN*<sub>H66E</sub> recombinant plasmid was then digested with *Xba* I and *Eco* RI and ligated into the pUT18C vector cut with the same restriction enzymes.

**pHR706** (pUT18C-*ptsN*<sub>H66A</sub>)

DNA fragment of *C. crescentus* *CCNA\_03710* encompassing mutations H66A was synthesized as a gBlock (IDT) and cloned into pSK. The pSK- *ptsN*<sub>H66A</sub> recombinant plasmid was then digested with *Xba* I and *Eco* RI and ligated into the pUT18C vector cut with the same restriction enzymes.

**pHR711** (pNPTS138-*ptsN*<sub>H66E</sub>)

DNA fragment of *C. crescentus* *CCNA\_03710* encompassing mutations H66E was synthesized as a gBlock (IDT) and cloned into pNPTS138 cut with *Eco* RV.

**pHR712** (pNPTS138-*ptsN*<sub>H66A</sub>)

DNA fragment of *C. crescentus* *CCNA\_03710* encompassing mutations H66A was synthesized as a gBlock (IDT) and cloned into pNPTS138 cut with *Eco* RV.

**pHR764** (pKT25-*spoT*)

*C. crescentus* *CCNA\_01622* was amplified from NA1000 gDNA by PCR with primers 1175 and 1176 and cloned into pSK. The pSK-1175/1176 recombinant plasmid was then digested with *Xba* I and *Eco* RI and ligated into the pKT25 vector cut with the same restriction enzymes.

**pHR765** (pKT25-*spoT*<sub>D81G</sub>)

*C. crescentus* *CCNA\_01622* with the mutation D81G was amplified from a gain-of-function mutant isolated on swarm agar plates supplemented with 9 mM Glutamine by PCR with primers 1175 and 1176 and cloned into pSK. The pSK-1175/1176 recombinant plasmid was then digested with *Xba* I and *Eco* RI and ligated into the pKT25 vector cut with the same restriction enzymes.

**pHR813** (pBAD33-*ptsH*)

*C. crescentus* *CCNA\_00241* was amplified from NA1000 gDNA by PCR with primers 1349 and 1350 and cloned into pSK. The pSK-1349/1350 recombinant plasmid was

then digested with *Xba* I and *Pst* I and ligated into the pBAD33 vector cut with the same restriction enzymes.

**pHR815 (pKT25-*ptsH*)**

*C. crescentus* CCNA\_00241 was amplified from NA1000 gDNA by PCR with primers 1177 and 1178 and cloned into pSK. The pSK-1177/1178 recombinant plasmid was then digested with *Xba* I and *Eco* RI and ligated into the pKT25 vector cut with the same restriction enzymes.

**pHR816 (pKT25-*ptsH*<sub>H18A</sub>)**

*C. crescentus* CCNA\_00241 with the mutation H18A was amplified by PCR with primers 1177 and 1178 and cloned into pSK. The pSK-1177/1178 recombinant plasmid was then digested with *Xba* I and *Eco* RI and ligated into the pKT25 vector cut with the same restriction enzymes.

**Description of Strains**

**RH577 (NA1000  $\Delta$ *glnD*)**

Biparental mating between NA1000 and RH528 (S17-1-pNPTS138- $\Delta$ *glnD*) was selected on PYE Nal Kan, streaked on PYE Kan, cultivated o/n in PYE and plated on PYE 3% Suc. Suc<sup>R</sup> candidates were streaked on PYE Kan and PYE. Kan<sup>S</sup> colonies were screened by PCR with primers 190/191.

**RH737 (NA1000  $\Delta$ *glnD* *stpX*::*stpX-gfp*)**

A CR30 lysate made on RH507 (NA1000 *stpX*::*stpX-gfp*) was transduced into RH577 (NA1000  $\Delta$ *glnD*). Transductants were selected on PYE Kan.

**RH770 (NA1000  $\Delta$ *glnK*)**

Biparental mating between NA1000 and RH766 (S17-1-pNPTS138- $\Delta$ *glnK*) was selected on PYE Nal Kan, streaked on PYE Kan, cultivated o/n in PYE and plated on PYE 3% Suc. Suc<sup>R</sup> candidates were streaked on PYE Kan and PYE. Kan<sup>S</sup> colonies were screened by PCR with primers 313/314.

**RH771 (NA1000  $\Delta$ *glnB*)**

Biparental mating between NA1000 and RH768 (S17-1-pNPTS138- $\Delta$ *glnA*) was selected on PYE Nal Kan, streaked on PYE Kan, cultivated o/n in PYE and plated on PYE 3% Suc. Suc<sup>R</sup> candidates were streaked on PYE Kan and PYE. Kan<sup>S</sup> colonies were screened by PCR with primers 315/316.

**RH772** (NA1000  $\Delta glnA$ )

Biparental mating between NA1000 and RH767 (S17-1-pNPTS138- $\Delta glnB$ ) was selected on PYE Nal Kan, streaked on PYE Kan, cultivated o/n in PYE and plated on PYE 3% Suc. Suc<sup>R</sup> candidates were streaked on PYE Kan and PYE. Kan<sup>S</sup> colonies were screened by PCR with primers 317/318.

**RH773** (NA1000  $\Delta glnC$ )

Biparental mating between NA1000 and RH769 (S17-1-pNPTS138- $\Delta glnC$ ) was selected on PYE Nal Kan, streaked on PYE Kan, cultivated o/n in PYE and plated on PYE 3% Suc. Suc<sup>R</sup> candidates were streaked on PYE Kan and PYE. Kan<sup>S</sup> colonies were screened by PCR with primers 311/312.

**RH778** (NA1000  $\Delta glnK \Delta glnC$ )

Biparental mating between RH770 (NA1000  $\Delta glnK$ ) and RH769 (S17-1-pNPTS138- $\Delta glnC$ ) was selected on PYE Nal Kan, streaked on PYE Kan, cultivated o/n in PYE and plated on PYE 3% Suc. Suc<sup>R</sup> candidates were streaked on PYE Kan and PYE. Kan<sup>S</sup> colonies were screened by PCR with primers 311/312.

**RH793** (NA1000  $\Delta glnD mipZ::mipZ-mcfp$ )

Biparental mating between RH577 (NA1000  $\Delta glnD$ ) and S17-1-pNPTS138- $mipZ-mcfp$  was selected on PYE Nal Kan, streaked on PYE Kan, cultivated o/n in PYE and plated on PYE 3% Suc. Suc<sup>R</sup> candidates were streaked on PYE Kan and PYE. Kan<sup>S</sup> colonies were screened by fluorescence microscopy.

**RH874** (NA1000  $\Delta glnE$ )

Biparental mating between NA1000 and RH871 (S17-1-pNPTS138- $\Delta glnE$ ) was selected on PYE Nal Kan, streaked on PYE Kan, cultivated o/n in PYE and plated on PYE 3% Suc. Suc<sup>R</sup> candidates were streaked on PYE Kan and PYE. Kan<sup>S</sup> colonies were screened by PCR with primers 435/436.

**RH875** (NA1000  $\Delta glnD \Delta glnE$ )

Biparental mating between RH577 (NA1000  $\Delta glnD$ ) and RH871 (S17-1-pNPTS138- $\Delta glnE$ ) was selected on PYE Nal Kan, streaked on PYE Kan, cultivated o/n in PYE and plated on PYE 3% Suc. Suc<sup>R</sup> candidates were streaked on PYE Kan and PYE. Kan<sup>S</sup> colonies were screened by PCR with primers 435/436.

**RH876** (NA1000  $\Delta glnA_2$ )

Biparental mating between NA1000 and RH872 (S17-1-pNPTS138- $\Delta glnA_2$ ) was



selected on PYE Nal Kan, streaked on PYE Kan, cultivated o/n in PYE and plated on PYE 3% Suc. Suc<sup>R</sup> candidates were streaked on PYE Kan and PYE. Kan<sup>S</sup> colonies were screened by PCR with primers 437/438.

**RH877** (NA1000  $\Delta glnA_3$ )

Biparental mating between NA1000 and RH873 (S17-1-pNPTS138- $\Delta glnA_3$ ) selected on PYE Nal Kan, streaked on PYE Kan, cultivated o/n in PYE and plated on PYE 3% Suc. Suc<sup>R</sup> candidates were streaked on PYE Kan and PYE. Kan<sup>S</sup> colonies were screened by PCR with primers 439/440.

**RH878** (NA1000  $\Delta glnA_2 \Delta glnA_3$ )

Biparental mating between RH876 (NA1000  $\Delta glnA_2$ ) and RH873 (S17-1-pNPTS138- $\Delta glnA_3$ ) was selected on PYE Nal Kan, streaked on PYE Kan, cultivated o/n in PYE and plated on PYE 3% Suc. Suc<sup>R</sup> candidates were streaked on PYE Kan and PYE. Kan<sup>S</sup> colonies were screened by PCR with primers 439/440.

**RH879** (NA1000  $\Delta glnA_2 \Delta glnA_3 \Delta glnA$ )

Biparental mating between RH878 (NA1000  $\Delta glnA_2 \Delta glnA_3$ ) and RH767 (S17-1-pNPTS138- $\Delta glnB$ ) was selected on PYE Nal Kan, streaked on PYE Kan, cultivated o/n in PYE and plated on PYE 3% Suc. Suc<sup>R</sup> candidates were streaked on PYE Kan and PYE. Kan<sup>S</sup> colonies were screened by PCR with primers 317/318.

**RH970** (NA1000  $\Delta glnA_2 \Delta glnA$ )

Biparental mating between RH876 (NA1000  $\Delta glnA_2$ ) and RH767 (S17-1-pNPTS138- $\Delta glnB$ ) was selected on PYE Nal Kan, streaked on PYE Kan, cultivated o/n in PYE and plated on PYE 3% Suc. Suc<sup>R</sup> candidates were streaked on PYE Kan and PYE. Kan<sup>S</sup> colonies were screened by PCR with primers 317/318.

**RH971** (NA1000  $\Delta glnA_3 \Delta glnA$ )

Biparental mating between RH877 (NA1000  $\Delta glnA_3$ ) and RH767 (S17-1-pNPTS138- $\Delta glnB$ ) was selected on PYE Nal Kan, streaked on PYE Kan, cultivated o/n in PYE and plated on PYE 3% Suc. Suc<sup>R</sup> candidates were streaked on PYE Kan and PYE. Kan<sup>S</sup> colonies were screened by PCR with primers 317/318.

**RH1458** (NA1000  $\Delta ntrC$ )

Triparental mating between NA1000, RH319 (MT607-pRK600) and RH1403 (Top10-pNPTS138- $\Delta ntrC$ ) was selected on PYE Nal Kan, streaked on PYE Kan, cultivated

o/n in PYE and plated on PYE 3% Suc. Suc<sup>R</sup> candidates were streaked on PYE Kan and PYE. Kan<sup>S</sup> colonies were screened by PCR with primers 779/780.

**RH1459** (NA1000  $\Delta ntrX$ )

Triparental mating between NA1000, RH319 (MT607-pRK600) and RH1404 (Top10-pNPTS138- $\Delta ntrX$ ) was selected on PYE Nal Kan, streaked on PYE Kan, cultivated o/n in PYE and plated on PYE 3% Suc. Suc<sup>R</sup> candidates were streaked on PYE Kan and PYE. Kan<sup>S</sup> colonies were screened by PCR with primers 781/782.

**RH1621** (NA1000  $\Delta ptsH$ )

Triparental mating between NA1000, RH319 (MT607-pRK600) and RH1605 (Top10-pNPTS138- $\Delta ptsH$ ) was selected on PYE Nal Kan, streaked on PYE Kan, cultivated o/n in PYE and plated on PYE 3% Suc. Suc<sup>R</sup> candidates were streaked on PYE Kan and PYE. Kan<sup>S</sup> colonies were screened by PCR with primers 814/815.

**RH1622** (NA1000  $\Delta ptsM$ )

Triparental mating between NA1000, RH319 (MT607-pRK600) and RH1604 (Top10-pNPTS138- $\Delta ptsM$ ) was selected on PYE Nal Kan, streaked on PYE Kan, cultivated o/n in PYE and plated on PYE 3% Suc. Suc<sup>R</sup> candidates were streaked on PYE Kan and PYE. Kan<sup>S</sup> colonies were screened by PCR with primers 814/815.

**RH1632** (NA1000 *glnA*<sub>R360A</sub>)

Triparental mating between NA1000, RH319 (MT607-pRK600) and RH1417 (Top10-pNPTS138-*glnA*<sub>R360A</sub>) was selected on PYE Nal Kan, cultivated o/n in PYE and plated on PYE 3% Suc. Suc<sup>R</sup> candidates were streaked on PYE 9.3 mM Gln Kan, M2G and PYE 9.3 mM Gln. Kan<sup>S</sup> colonies unable to grow on M2G were screened by PCR with primers 727/728 and sequencing with primer 727.

**RH1702** (NA1000  $\Delta ptsH \Delta ptsM$ )

Triparental mating between RH1621 (NA1000  $\Delta ptsH$ ), RH319 (MT607-pRK600) and RH1604 (Top10-pNPTS138- $\Delta ptsM$ ) was selected on PYE Nal Kan, streaked on PYE Kan, cultivated o/n in PYE and plated on PYE 3% Suc. Suc<sup>R</sup> candidates were streaked on PYE Kan and PYE. Kan<sup>S</sup> colonies were screened by PCR with primers 814/815.

**RH1727** (NA1000  $\Delta ptsP spoT$ <sub>D81G</sub>)

Triparental mating between RH1758 (NA1000  $\Delta ptsP$ ), RH319 (MT607-pRK600) and RH1743 (Top10-pNPTS138-*spoT*<sub>D81G</sub>) was selected on PYE Nal Kan, cultivated o/n

in PYE and plated on PYE 3% Suc. Smallest Suc<sup>R</sup> colonies were streaked on PYE Kan and PYE. Kan<sup>S</sup> colonies were screened by PCR with primers 894/895 and sequencing with primer 894.

**RH1728** (NA1000  $\Delta spoT ptsP_{L83Q}$ )

Triparental mating between RH1755 (NA1000  $\Delta spoT$ ), RH319 (MT607-pRK600) and RH1737 (Top10-pNPTS138-*ptsP<sub>L83Q</sub>*) was selected on PYE Nal Kan, cultivated o/n in PYE and plated on PYE 3% Suc. Smallest Suc<sup>R</sup> colonies were streaked on PYE Kan and PYE. Kan<sup>S</sup> colonies were screened by PCR with primers 877/878 and sequencing with primer 877.

**RH1748** (NA1000 *ptsP<sub>L83Q</sub>*)

Triparental mating between NA1000, RH319 (MT607-pRK600) and RH1737 (Top10-pNPTS138-*ptsP<sub>L83Q</sub>*) was selected on PYE Nal Kan, cultivated o/n in PYE and plated on PYE 3% Suc. Smallest Suc<sup>R</sup> colonies were streaked on PYE Kan and PYE. Kan<sup>S</sup> colonies were screened by PCR with primers 877/878 and sequencing with primer 877.

**RH1752** (NA1000 *spoT<sub>D81G</sub>*)

Triparental mating between NA1000, RH319 (MT607-pRK600) and RH1743 (Top10-pNPTS138-*spoT<sub>D81G</sub>*) was selected on PYE Nal Kan, cultivated o/n in PYE and plated on PYE 3% Suc. Smallest Suc<sup>R</sup> colonies were streaked on PYE Kan and PYE. Kan<sup>S</sup> colonies were screened by PCR with primers 894/895 and sequencing with primer 894.

**RH1753** (NA1000  $\Delta glnD spoT_{D81G}$ )

Triparental mating between RH577 (NA1000  $\Delta glnD$ ), RH319 (MT607-pRK600) and RH1743 (Top10-pNPTS138-*spoT<sub>D81G</sub>*) was selected on PYE Nal Kan, cultivated o/n in PYE and plated on PYE 3% Suc. Smallest Suc<sup>R</sup> colonies were streaked on PYE Kan and PYE. Kan<sup>S</sup> colonies were screened by PCR with primers 894/895 and sequencing with primer 894.

**RH1755** (NA1000  $\Delta spoT$ )

Triparental mating between NA1000, RH319 (MT607-pRK600) and RH1747 (Top10-pNPTS138- $\Delta spoT$ ) was selected on PYE Nal Kan, streaked on PYE Kan, cultivated o/n in PYE and plated on PYE 3% Suc. Suc<sup>R</sup> candidates were streaked on PYE Kan and PYE. Kan<sup>S</sup> colonies were screened by PCR with primers 898/899.

**RH1756** (NA1000  $\Delta glnD \Delta spoT$ )

Triparental mating between RH577 (NA1000  $\Delta glnD$ ), RH319 (MT607-pRK600) and RH1747 (Top10-pNPTS138- $\Delta spoT$ ) was selected on PYE Nal Kan, streaked on PYE Kan, cultivated o/n in PYE and plated on PYE 3% Suc. Suc<sup>R</sup> candidates were streaked on PYE Kan and PYE. Kan<sup>S</sup> colonies were screened by PCR with primers 898/899.

**RH1758** (NA1000  $\Delta ptsP$ )

Triparental mating between NA1000, RH319 (MT607-pRK600) and RH1757 (Top10-pNPTS138- $\Delta ptsP$ ) was selected on PYE Nal Kan, streaked on PYE Kan, cultivated o/n in PYE and plated on PYE 3% Suc. Suc<sup>R</sup> candidates were streaked on PYE Kan and PYE. Kan<sup>S</sup> colonies were screened by PCR with primers 926/927.

**RH1782** (NA1000  $\Delta ptsM ptsH_{H18A}$ )

Triparental mating between RH1622 (NA1000  $\Delta ptsM$ ), RH319 (MT607-pRK600) and RH1737 (Top10-pNPTS138- $ptsH_{H18A}$ ) was selected on PYE Nal Kan, cultivated o/n in PYE and plated on PYE 3% Suc. Biggest Suc<sup>R</sup> colonies were streaked on PYE Kan and PYE. Kan<sup>S</sup> colonies were screened by PCR with primers 806/826 and sequencing with primer 826.

**RH1819** (NA1000  $\Delta ptsN$ )

Triparental mating between NA1000, RH319 (MT607-pRK600) and RH1784 (Top10-pNPTS138- $\Delta ptsN$ ) was selected on PYE Nal Kan, streaked on PYE Kan, cultivated o/n in PYE and plated on PYE 3% Suc. Suc<sup>R</sup> candidates were streaked on PYE Kan and PYE. Kan<sup>S</sup> colonies were screened by PCR with primers 963/964.

**RH1829** (NA1000  $\Delta ptsM \Delta ptsN$ )

Triparental mating between RH1622 (NA1000  $\Delta ptsM$ ), RH319 (MT607-pRK600) and RH1784 (Top10-pNPTS138- $\Delta ptsN$ ) was selected on PYE Nal Kan, streaked on PYE Kan, cultivated o/n in PYE and plated on PYE 3% Suc. Suc<sup>R</sup> candidates were streaked on PYE Kan and PYE. Kan<sup>S</sup> colonies were screened by PCR with primers 963/964.

**RH1844** (NA1000  $spoT_{Y323A}$ )

Triparental mating between RH50 (NA1000), RH319 (MT607-pRK600) and RH1817 (Top10-pNPTS138- $spoT_{Y323A}$ ) was selected on PYE Nal Kan, streaked on PYE Kan, cultivated o/n in PYE and plated on PYE 3% Suc. Suc<sup>R</sup> candidates were streaked on

PYE Kan and PYE. Kan<sup>S</sup> colonies were screened by PCR with primers 923/933 and 1175/1176.

**RH1888** (NA1000 *3FLAG-ptsN*)

Triparental mating between RH50 (NA1000), RH319 (MT607-pRK600) and RH1885 (Top10-pNPTS138-*3FLAG-ptsN*) was selected on PYE Nal Kan, streaked on PYE Kan, cultivated o/n in PYE and plated on PYE 3% Suc. Suc<sup>R</sup> candidates were streaked on PYE Kan and PYE. Kan<sup>S</sup> colonies were screened by PCR with primers 961/964.

**RH1940** (NA1000  $\Delta$ *glnD*  $\Delta$ *ptsP*)

Triparental mating between RH577 (NA1000  $\Delta$ *glnD*), RH319 (MT607-pRK600) and RH1757 (Top10-pNPTS138- $\Delta$ *ptsP*) was selected on PYE Nal Kan, streaked on PYE Kan, cultivated o/n in PYE and plated on PYE 3% Suc. Suc<sup>R</sup> candidates were streaked on PYE Kan and PYE. Kan<sup>S</sup> colonies were screened by PCR with primers 926/927.

**RH1941** (NA1000 *ptsP*<sub>L83Q</sub>  $\Delta$ *glnD*)

Biparental mating between RH1748 (NA1000 *ptsP*<sub>L83Q</sub>), RH528 (S17-1-pNPTS138- $\Delta$ *glnD*) was selected on PYE Nal Kan, streaked on PYE Kan, cultivated o/n in PYE and plated on PYE 3% Suc. Suc<sup>R</sup> candidates were streaked on PYE Kan and PYE. Kan<sup>S</sup> colonies were screened by PCR with primers 190/191.

**RH1999** (NA1000 *spoT*<sub>D81G</sub>  $\Delta$ *ptsM*)

Triparental mating between RH1752 (NA1000 *spoT*<sub>D81G</sub>), RH319 (MT607-pRK600) and RH1784 (Top10-pNPTS138- $\Delta$ *ptsM*) was selected on PYE Nal Kan, streaked on PYE Kan, cultivated o/n in PYE and plated on PYE 3% Suc. Suc<sup>R</sup> candidates were streaked on PYE Kan and PYE. Kan<sup>S</sup> colonies were screened by PCR with primers 963/964.

**RH2013** (NA1000 *spoT*<sub>D81G</sub>  $\Delta$ *ptsH*)

Triparental mating between RH1752 (NA1000 *spoT*<sub>D81G</sub>), RH319 (MT607-pRK600) and RH1605 (Top10-pNPTS138- $\Delta$ *ptsH*) was selected on PYE Nal Kan, streaked on PYE Kan, cultivated o/n in PYE and plated on PYE 3% Suc. Suc<sup>R</sup> candidates were streaked on PYE Kan and PYE. Kan<sup>S</sup> colonies were screened by PCR with primers 814/815.

**RH2014** (NA1000 *spoT*<sub>D81G</sub>  $\Delta$ *ptsN*  $\Delta$ *ptsP*)

Triparental mating between RH1999 (NA1000 *spoT<sub>D81G</sub> ΔptsN*), RH319 (MT607-pRK600) and RH1757 (Top10-pNPTS138-*ΔptsP*) was selected on PYE Nal Kan, streaked on PYE Kan, cultivated o/n in PYE and plated on PYE 3% Suc. Suc<sup>R</sup> candidates were streaked on PYE Kan and PYE. Kan<sup>S</sup> colonies were screened by PCR with primers 926/927.

**RH2015** (NA1000 *spoT<sub>D81G</sub> ΔptsN ΔptsH*)

Triparental mating between RH1999 (NA1000 *spoT<sub>D81G</sub> ΔptsN*), RH319 (MT607-pRK600) and RH1605 (Top10-pNPTS138-*ΔptsH*) was selected on PYE Nal Kan, streaked on PYE Kan, cultivated o/n in PYE and plated on PYE 3% Suc. Suc<sup>R</sup> candidates were streaked on PYE Kan and PYE. Kan<sup>S</sup> colonies were screened by PCR with primers 814/815.

**RH2016** (NA1000 *ΔptsP ptsN<sub>H66E</sub>*)

Triparental mating between RH1758 (NA1000 *ΔptsP*), RH319 (MT607-pRK600) and RH1523 (Top10-pNPTS138-*ptsN<sub>H66E</sub>*) was selected on PYE Nal Kan, cultivated o/n in PYE and plated on PYE 3% Suc. Smallest Suc<sup>R</sup> colonies were streaked on PYE Kan and PYE. Kan<sup>S</sup> colonies were screened by PCR with primers 963/964 and sequencing with primer 1126.

**RH2017** (NA1000 *ptsN<sub>H66E</sub>*)

Biparental mating between RH50 (NA1000) and S17-1-pNPTS138-USCFP-*rodZ*<sup>14</sup> was selected on PYE Nal Kan. A CR30 lysate made on NA1000 pNPTS138-USCFP-*rodZ* was transduced into RH2016 (NA1000 *ΔptsP ptsN<sub>H66E</sub>*). Transductants were selected on PYE Kan, cultivated o/n in PYE and plated on PYE 3% Suc. The presence of *ptsP*, backcrossed together with USCFP-*rodZ*, was checked by PCR with primers 972/973.

**RH2018** (NA1000 *ptsP<sub>L83Q</sub> ptsN<sub>H66A</sub>*)

Triparental mating between RH1748 (NA1000 *ptsP<sub>L83Q</sub>*), RH319 (MT607-pRK600) and RH1538 (Top10-pNPTS138-*ptsN<sub>H66A</sub>*) was selected on PYE Nal Kan, cultivated o/n in PYE and plated on PYE 3% Suc. Biggest Suc<sup>R</sup> colonies were streaked on PYE Kan and PYE. Kan<sup>S</sup> colonies were screened by PCR with primers 963/964 and sequenced with primer 1126.

**RH2084** (MG1655 *ΔptsP::cat*)

*cat* was amplified from pKD3 by PCR using primers 1262/1263, transformed into

RH392 electrocompetent cells (pre-induced 15' at 42°C). Recombinant clones were selected on LA Cam plates at 37°C and screened by PCR with primers 1275/1276.

**RH2117** (MG1655 *cyaA::frt ΔptsP*)

A P1 lysate made on RH2084 (LHR106) was transduced into RH785 (MG1655 *cyaA::frt*). Transductants were selected on LA Cam. Cam<sup>R</sup> colonies were then screened by PCR with primers 1275/1276. Candidates were then transformed with pCP20 and selected on LA Amp plates at 30°C. Clones were then streaked twice on LA plates and incubated at 42°C to get rid of *cat* cassette and pCP20. Cam<sup>S</sup> candidates were screened by PCR with primers 1275/1276.

**RH2122** (MG1655 *cyaA::frt Δnpr*)

A P1 lysate made on a MG1655 *Δnpr::kan* (L. Van Melderen lab) was transduced in RH785 (MG1655 *cyaA::frt*). Transductants were selected on LA Kan. Kan<sup>R</sup> colonies were screened by PCR with primers 1310/1311. Candidates were then transformed with pCP20 and selected on LA Amp plates at 30°C. Clones were then streaked twice on LA plates and incubated at 42°C to get rid of *kan* cassette and pCP20. Kan<sup>S</sup> candidates were screened by PCR with primers 1310/1311.

**RH2124** (MG1655 *cyaA::frt ΔptsPΔptsI*)

A P1 lysate made on a MG1655 *ΔptsI::kan* (from L. Van Melderen lab) was transduced in RH2117 (MG1655 *cyaA::frt ΔptsP*). Transductants were selected on LA Kan. Kan<sup>R</sup> colonies were screened by PCR with primers 1273/1274. Candidates were then transformed with pCP20 and selected on LA Amp plates at 30°C. Clones were then streaked twice on LA plates and incubated at 42°C to get rid of *kan* cassette and pCP20. Kan<sup>S</sup> candidates were screened by PCR with primers 1273/1274.

**RH2191** (NA1000 pXMCS2-3FLAG-*ptsN*)

Triparental mating between RH50 (NA1000), RH319 (MT607-pRK600) and RH2204 (Top10-pXMCS2-3FLAG-*ptsN*) was selected on PYE Nal Kan.

**RH2192** (NA1000 *ΔptsP* pXMCS2-3FLAG-*ptsN*)

Triparental mating between RH1758 (NA1000 *ΔptsP*), RH319 (MT607-pRK600) and RH2204 (Top10-pXMCS2-3FLAG-*ptsN*) was selected on PYE Nal Kan.

**RH2193** (NA1000 *spoT<sub>D81G Y323A</sub>*)

Triparental mating between RH1752 (NA1000 *spoT<sub>D81G</sub>*), RH319 (MT607-pRK600) and RH1817 (Top10-pNPTS138-*spoT<sub>Y323A</sub>*) was selected on PYE Nal Kan, streaked on PYE Kan, cultivated o/n in PYE and plated on PYE 3% Suc. Suc<sup>R</sup> candidates were streaked on PYE Kan and PYE. Kan<sup>S</sup> colonies were screened by PCR with primers 923/933 and 1175/1176.

**RH2194** (NA1000 *ptsN<sub>H66A</sub> spoT<sub>Y323A</sub>*)

Triparental mating between RH2019 (NA1000 *ptsN<sub>H66A</sub>*), RH319 (MT607-pRK600) and RH1817 (Top10-pNPTS138-*spoT<sub>Y323A</sub>*) was selected on PYE Nal Kan, streaked on PYE Kan, cultivated o/n in PYE and plated on PYE 3% Suc. Suc<sup>R</sup> candidates were streaked on PYE Kan and PYE. Kan<sup>S</sup> colonies were screened by PCR with primers 923/933 and 1175/1176.

**RH2195** (NA1000 *ptsN<sub>H66E</sub> spoT<sub>Y323A</sub>*)

Triparental mating between RH2017 (NA1000 *ptsN<sub>H66E</sub>*), RH319 (MT607-pRK600) and RH1817 (Top10-pNPTS138-*spoT<sub>Y323A</sub>*) was selected on PYE Nal Kan, streaked on PYE Kan, cultivated o/n in PYE and plated on PYE 3% Suc. Suc<sup>R</sup> candidates were streaked on PYE Kan and PYE. Kan<sup>S</sup> colonies were screened by PCR with primers 923/933 and 1175/1176.

**RH2196** (NA1000  $\Delta$ *ptsP spoT<sub>Y323A</sub>*)

Triparental mating between RH1758 (NA1000  $\Delta$ *ptsP*), RH319 (MT607-pRK600) and RH1817 (Top10-pNPTS138-*spoT<sub>Y323A</sub>*) was selected on PYE Nal Kan, streaked on PYE Kan, cultivated o/n in PYE and plated on PYE 3% Suc. Suc<sup>R</sup> candidates were streaked on PYE Kan and PYE. Kan<sup>S</sup> colonies were screened by PCR with primers 923/933 and 1175/1176.



## Supplementary References

1. Hogg, T., Mechold, U., Malke, H., Cashel, M. & Hilgenfeld, R. Conformational antagonism between opposing active sites in a bifunctional RelA/SpoT homolog modulates (p)ppGpp metabolism during the stringent response [corrected]. *Cell* **117**, 57–68 (2004).
2. Thanbichler, M., Iniesta, A. A. & Shapiro, L. A comprehensive set of plasmids for vanillate- and xylose-inducible gene expression in *Caulobacter crescentus*. *Nucleic Acids Research* **35**, e137–e137 (2007).
3. Schofield, W. B., Lim, H. C. & Jacobs-Wagner, C. Cell cycle coordination and regulation of bacterial chromosome segregation dynamics by polarly localized proteins. *The EMBO Journal* **29**, 3068–3081 (2010).
4. Boutte, C. C. & Crosson, S. The complex logic of stringent response regulation in *Caulobacter crescentus*: starvation signalling in an oligotrophic environment. *Molecular Microbiology* **80**, 695–714 (2011).
5. Karimova, G., Pidoux, J., Ullmann, A. & Ladant, D. A bacterial two-hybrid system based on a reconstituted signal transduction pathway. *Proc. Natl. Acad. Sci. U.S.A.* **95**, 5752–5756 (1998).
6. Cherepanov. Gene disruption in *Escherichia coli*. *Gene* 1–6 (2003).
7. Guzman, L. M., Belin, D., Carson, M. J. & Beckwith, J. Tight regulation, modulation, and high-level expression by vectors containing the arabinose PBAD promoter. *Journal of Bacteriology* **177**, 4121–4130 (1995).
8. Gonzalez, D. & Collier, J. Effects of (p)ppGpp on the Progression of the Cell Cycle of *Caulobacter crescentus*. *Journal of Bacteriology* **196**, 2514–2525 (2014).
9. Simon, R., Priefer, U. & Pühler, A. A broad host range mobilization system in vivo genetic engineering: transposon mutagenesis in gram negative bacteria. **1**, 784–791 (1983).
10. Casadaban, M. J. & Cohen, S. N. Analysis of gene control signals by DNA fusion and cloning in *Escherichia coli*. *J. Mol. Biol.* **138**, 179–207 (1980).
11. Abel, S. *et al.* Regulatory cohesion of cell cycle and cell differentiation through interlinked phosphorylation and second messenger networks. *Molecular Cell* **43**, 550–560 (2011).
12. Evinger, M. & Agabian, N. Envelope-associated nucleoid from *Caulobacter crescentus* stalked and swarmer cells. **132**, 294–301 (1977).
13. Hughes, H. V. *et al.* Protein localization and dynamics within a bacterial organelle. *Proceedings of the National Academy of Sciences* **107**, 5599–5604 (2010).
14. Alyahya, S. A. *et al.* RodZ, a component of the bacterial core morphogenic apparatus. *Proceedings of the National Academy of Sciences* **106**, 1239–1244 (2009).
